# Supplementary material
Source: PubMed Central journal article supplement (PMC7269595)
Supplement: jci-130-131190-s350.pdf [file jci-130-131190-s350.pdf]

# **Glycerol-3-phosphate is a FGF23 regulator derived from the injured kidney**

## **Supplemental Material**

Supplemental Figure 1: G-3-P effect on FGF23 is specific and unidirectional

Supplemental Figure 2: Correlations between total renal venous LPA and FGF23 and between LPA 18:1 and total LPA

Supplemental Figure 3: GPAT2 mediates the effect of G-3-P on LPA and FGF23 in primary osteoblasts

Supplemental Figure 4: LPA cooperates with 1,25(OH)<sub>2</sub>D in cultured osteocytes

Supplemental Figure 5: Glycolytic intermediates, LPA, and nonspecific LPAR inhibition in modeled AKI

Supplemental Figure 6: Post-operative G-3-P correlates with subsequent cFGF23 elevation

Supplemental Table 1: Correlations ( $r^2$ ) between all venous metabolites (known) and arterial iFGF23

Supplemental Table 2: Correlations ( $r^2$ ) between all venous proteins and arterial iFGF23

Supplemental Table 3: Correlations ( $r^2$ ) between G-3-P, iFGF23, phosphate, klotho, eGFR

Supplemental Table 4: Oligonucleotide sequences

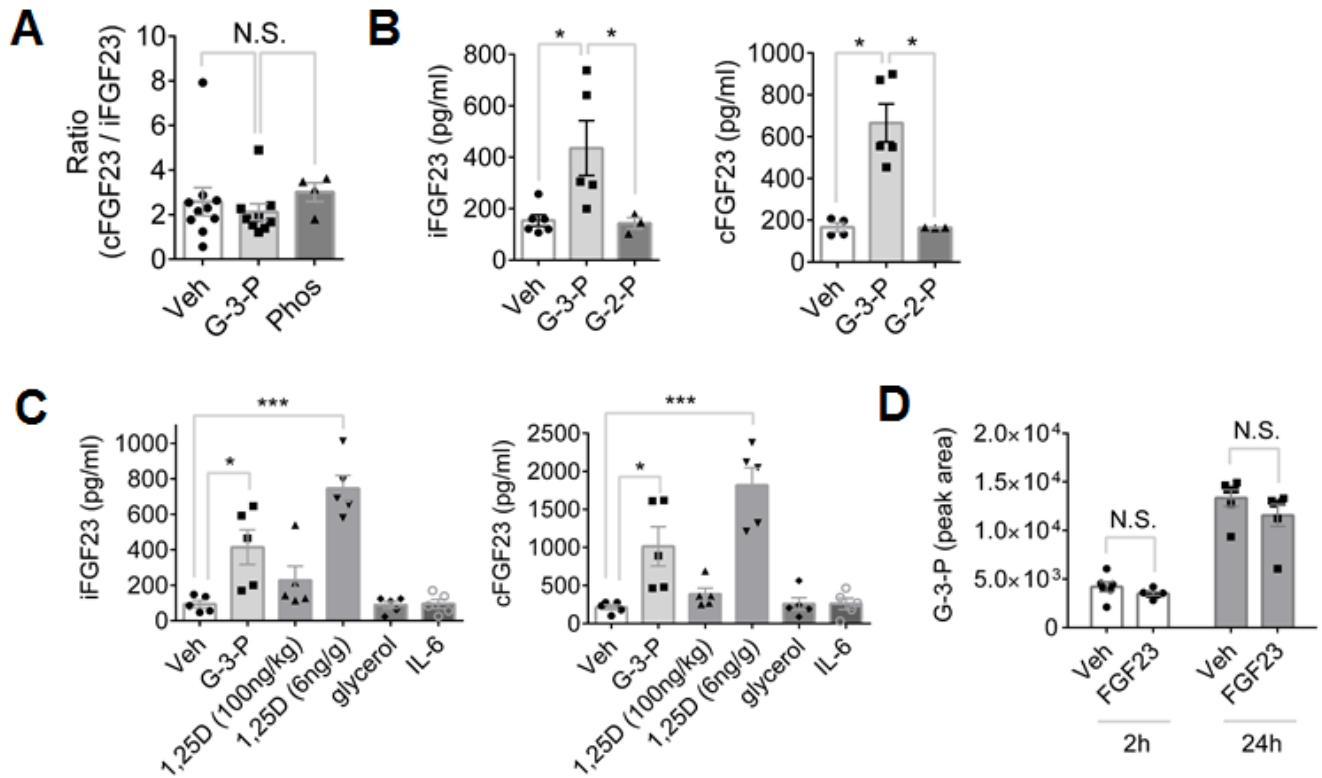

**Supplemental Figure 1. G-3-P effect on FGF23 is specific and unidirectional.** (A) Ratio of cFGF23 / iFGF23 levels after i.p. injection of G-3-P, sodium phosphate, or vehicle ( $n = 4-10$  per group). (B) Plasma iFGF23 and cFGF23 levels after i.p. injection of G-3-P, glycerol-2-phosphate (G-2-P) or vehicle ( $n = 3-6$  per group). (C) Plasma iFGF23 and cFGF23 levels after i.p. injection of G-3-P, 1,25(OH)<sub>2</sub>D (1,25D) at 100 ng/kg or 6 ng/g, glycerol, IL-6 (1.3 μg/kg), or vehicle ( $n = 5$  per group). Injection doses 300 mg/kg unless otherwise specified. (D) G-3-P levels in cultured media from opossum kidney cells treated for 2 or 24 h with recombinant FGF23 (10 ng/mL) or vehicle ( $n = 3$  per group). One-way ANOVA followed by Tukey's multiple comparisons test (A-C) or two-sided Student's t-test (D), bars show means  $\pm$  s.e.m; \* $P < 0.05$ , \*\*\* $P < 0.0001$ .

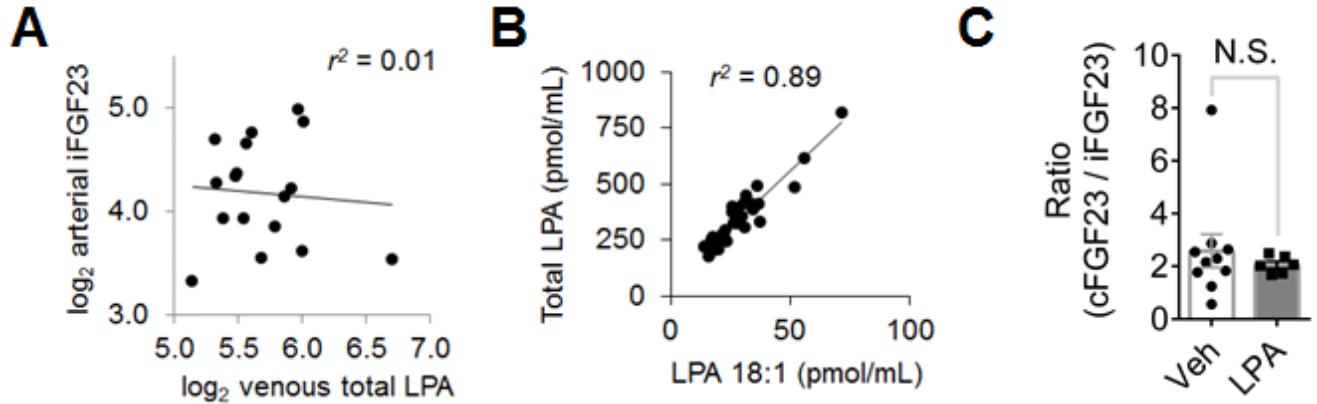

**Supplemental Figure 2. Correlations between total renal venous LPA and FGF23 and between LPA 18:1 and total LPA.** (A) Scatter plot showing correlation between total renal vein LPA and arterial iFGF23. (B) Correlation between LPA 18:1 and total LPA in renal arteriovenous samples. (C) Ratio of cFGF23 / iFGF23 levels after i.p. injection of LPA (50mg/kg) or vehicle ( $n = 6-10$  per group). Two-sided Student's t-test (C), bars show means  $\pm$  s.e.m.

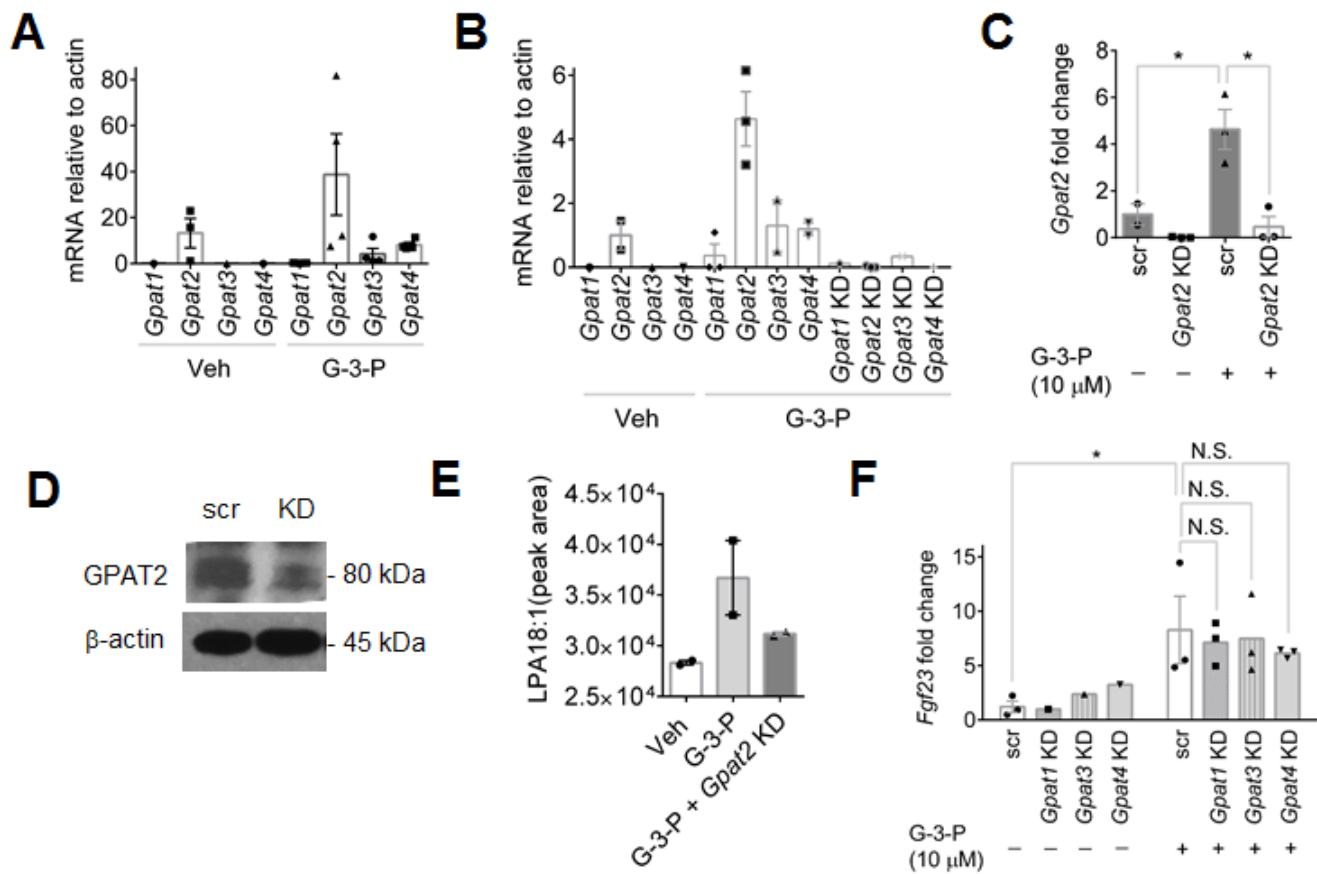

**Supplemental Figure 3. GPAT2 mediates the effect of G-3-P on LPA and FGF23 in primary osteoblasts.** (A) Expression of *Gpat* isoforms in bone marrow from mice treated with G-3-P (300 mg/kg) or vehicle ( $n = 3-4$ ). (B) Expression of *Gpat* isoforms in primary osteoblasts treated with G-3-P (10  $\mu$ M) or vehicle ( $n = 2-3$  per group). (C,D) *Gpat2* mRNA levels (C) and GPAT2 immunoblot (D, representative gel from one of two independent experiments) of primary osteoblasts treated with *Gpat2* or scrambled (scr) shRNA; qPCR performed on cells treated with G-3-P (10  $\mu$ M) or vehicle ( $n = 3$  per group). (E) LPA 18:1 levels in primary osteoblasts treated with G-3-P (10  $\mu$ M), with or without *Gpat2* knockdown ( $n = 2$  per group). (F) *Fgf23* mRNA levels in primary osteoblasts treated with *Gpat1*, *Gpat3*, *Gpat4*, or scr shRNA, with or without G-3-P (10  $\mu$ M) ( $n = 1-3$  per group). Two-way ANOVA followed by Tukey's multiple comparisons test (C, F), bars show means  $\pm$  s.e.m; \* $P < 0.05$ .

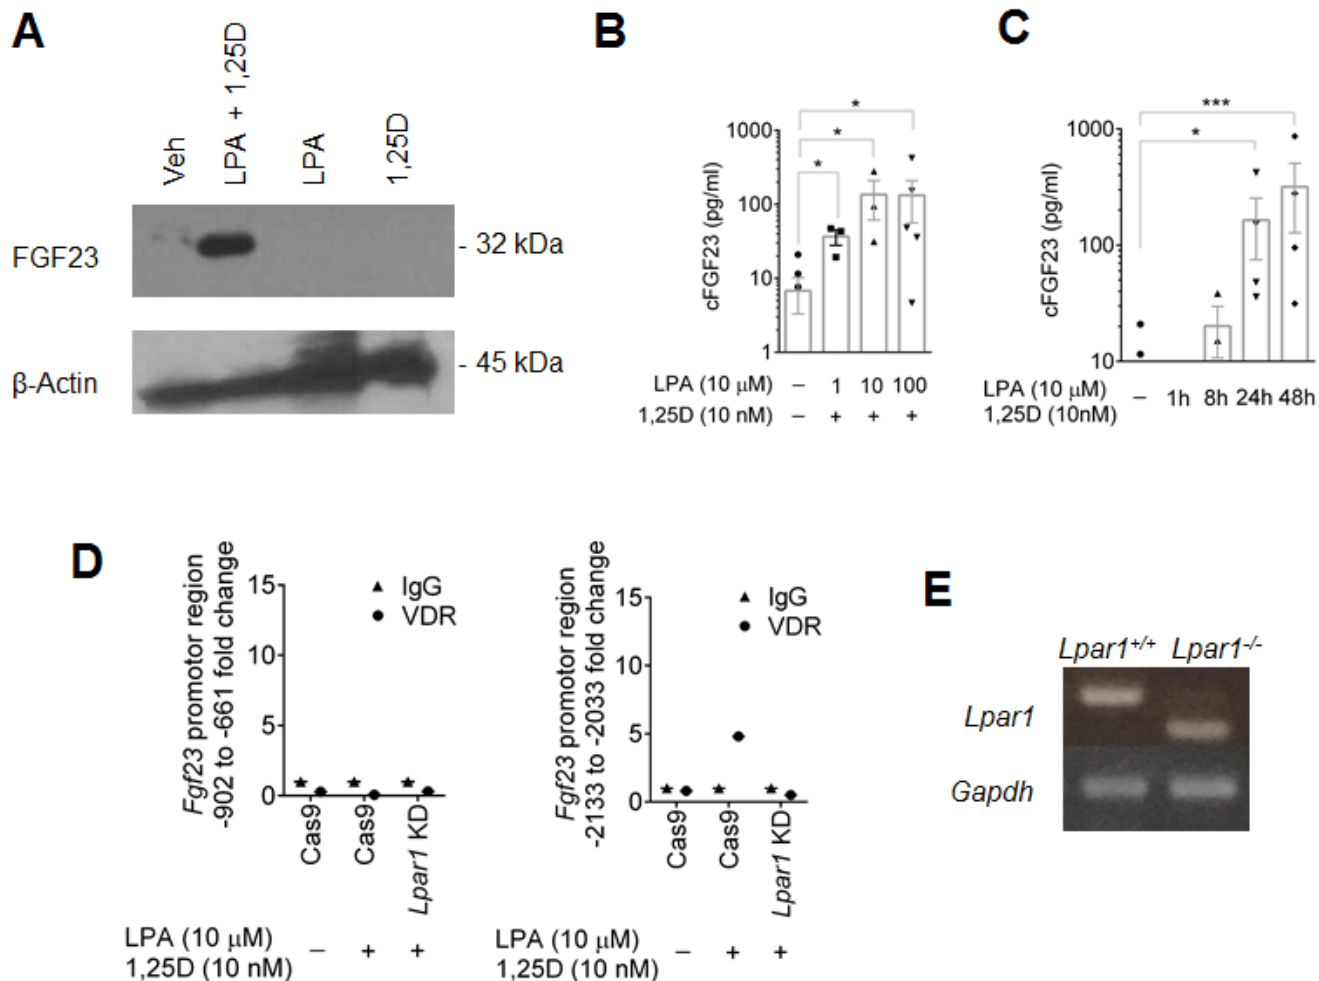

**Supplemental Figure 4. LPA cooperates with 1,25(OH)<sub>2</sub>D in cultured osteocytes.** (A-C) FGF23 immunoblot (A, representative gel from one of two independent experiments) and cFGF23 levels measured by ELISA in lysates from Ocy454 cells treated with increasing concentrations of LPA 18:1 (B) or with LPA 18:1 over time (C) ( $n = 2-5$  per group). One-way ANOVA followed by Tukey's multiple comparisons test (B,C), bars show means  $\pm$  s.e.m;  $*P < 0.05$ ,  $***P < 0.0001$ . (D) Chromatin immunoprecipitation of control regions of *Fgf23* promoter following LPA 18:1 and 1,25(OH)<sub>2</sub>D treatment in WT and *Lpar1* deficient cells. (E) PCR assay detecting inheritance of wild-type *Lpar1* (348 bp) and deletion mutation (227 bp).

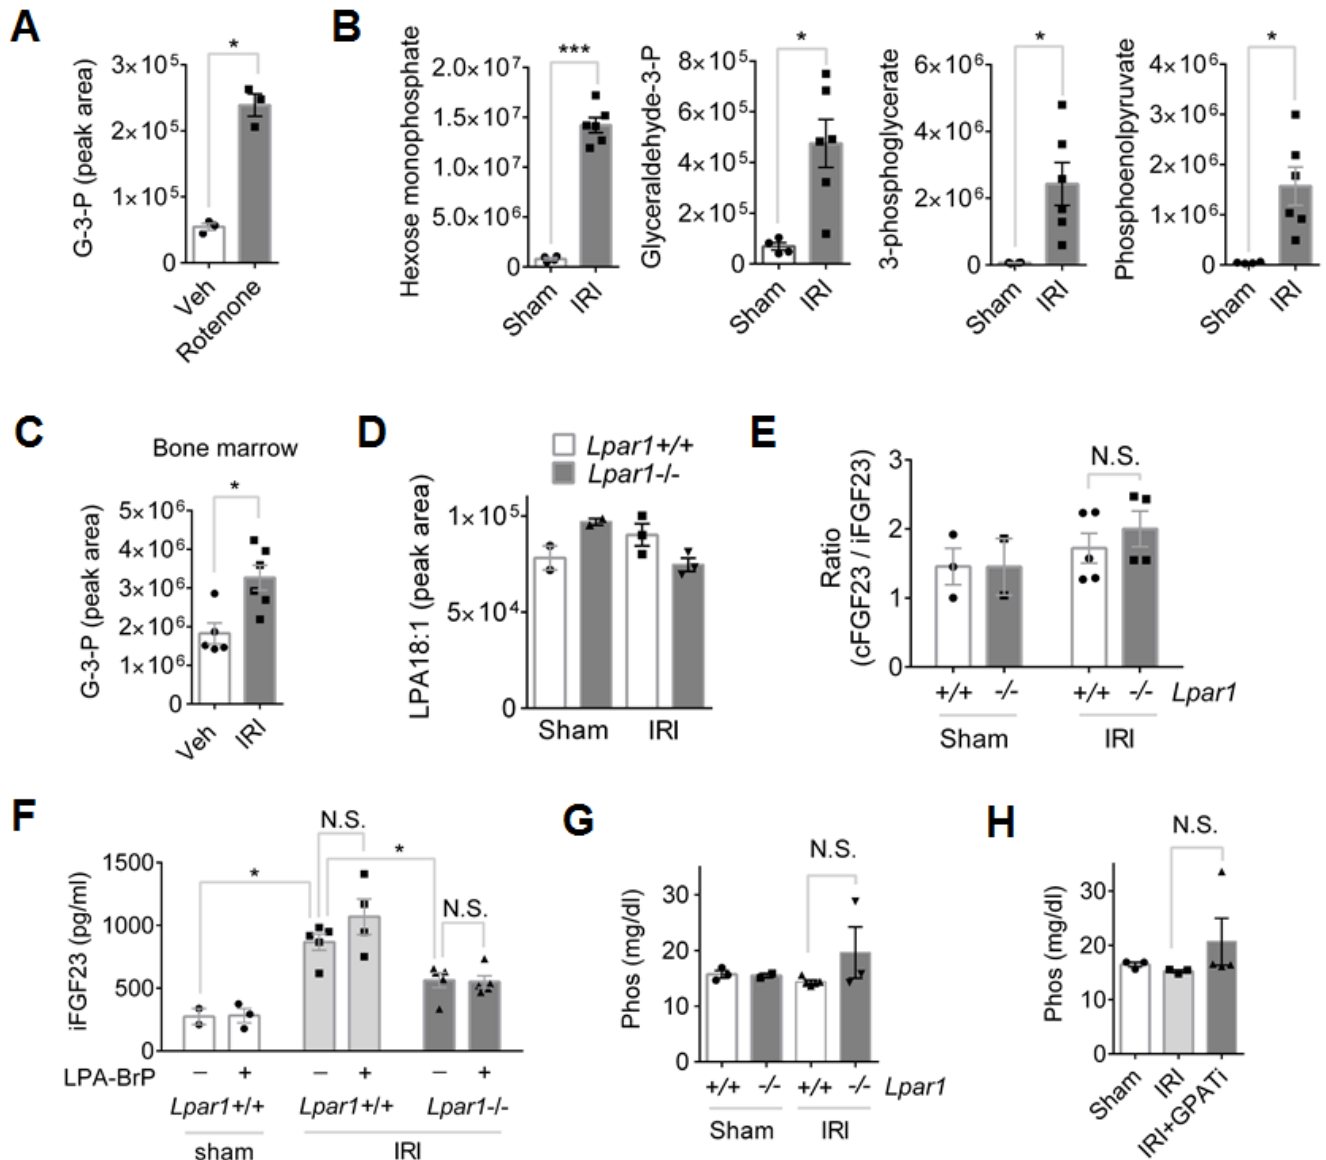

**Supplemental Figure 5. Glycolytic intermediates, LPA, and nonspecific LPAR inhibition in modeled AKI.**

(A) G-3-P levels in cultured media from renal epithelial cells (IMCD) treated for 24 h with rotenone ( $n = 3$  per group). (B) Plasma hexose monophosphate, glyceraldehyde-3-phosphate, 3-phosphoglycerate and phosphoenolpyruvate levels 4 h after IRI or sham surgery ( $n = 3-6$  per group). (C) Bone marrow G-3-P levels 4 h after IRI or sham surgery ( $n = 5-6$  per group). (D) Plasma LPA 18:1 levels 4 hrs after IRI in *Lpar1*<sup>-/-</sup> mice and *Lpar1*<sup>+/+</sup> littermates ( $n = 2-3$  per group). (E) Ratio of cFGF23 / iFGF23 levels in *Lpar1*<sup>-/-</sup> mice and *Lpar1*<sup>+/+</sup> littermates subjected to IRI ( $n = 2-6$  per group). (F) Plasma iFGF23 levels in *Lpar1*<sup>-/-</sup> mice and *Lpar1*<sup>+/+</sup> littermates subjected to IRI, with or without the non-specific LPAR antagonist LPA-bromophosphonate (LPA-BrP);  $n = 2-5$  per group. (G,H) Blood phosphate in *Lpar1*<sup>-/-</sup> mice and *Lpar1*<sup>+/+</sup> littermates subjected to IRI (G) and in C57Bl/6J mice subjected to IRI with or without FSG67 (H),  $n = 3-4$  per group. Two-sided Student's t-test (A-C), two-way ANOVA followed by Tukey's multiple comparisons test (D-G), or one-way ANOVA followed by Tukey's multiple comparison test (H), bars show means  $\pm$  s.e.m; \* $P < 0.05$ , \*\*\* $P < 0.0001$ .

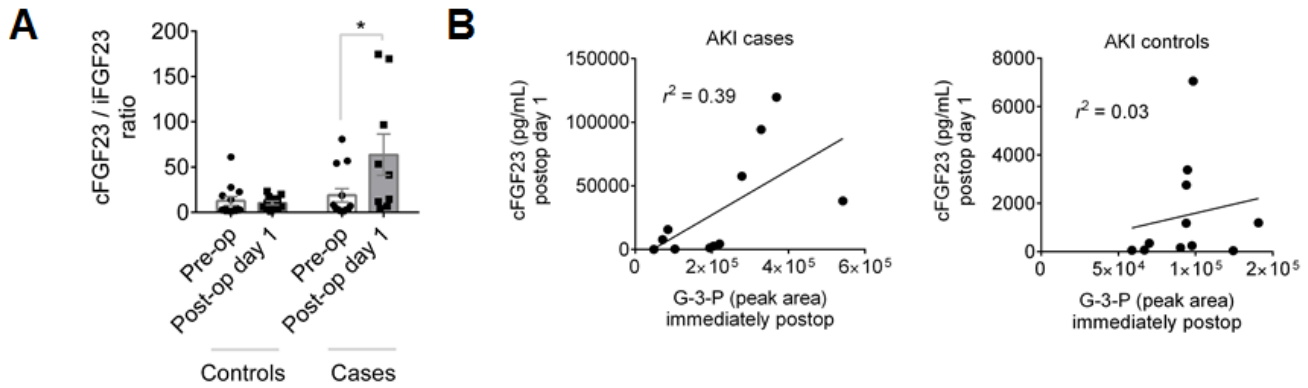

**Supplemental Figure 6. Post-operative G-3-P correlates with subsequent cFGF23 elevation.** (A) Ratio of cFGF23 / iFGF23 levels before and after cardiac surgery in AKI cases and controls ( $n = 13$  each group). Two-way ANOVA followed by Tukey's multiple comparisons test, bars show means  $\pm$  s.e.m;  $*P < 0.05$ . (B) Scatter plot of immediately post-operative plasma G-3-P levels and cFGF23 levels 24 hours after surgery among AKI cases (left) and controls (right).

**Supplemental Table 1.** Correlations ( $r^2$ ) between all venous metabolites (known) and arterial iFGF23

| <b>Metabolite</b>              | <b><math>r^2</math></b> |
|--------------------------------|-------------------------|
| glycerol-3-phosphate           | 0.76                    |
| carnitine                      | 0.56                    |
| ornithine                      | 0.44                    |
| C3 carnitine                   | 0.42                    |
| C10:2 carnitine                | 0.40                    |
| C5 carnitine                   | 0.40                    |
| 2/3-phosphoglycerate           | 0.39                    |
| arachidonic acid               | 0.39                    |
| 7-methylxanthine               | 0.38                    |
| palmitoleic acid               | 0.37                    |
| myristoleate                   | 0.35                    |
| N-alpha-acetylgarginine        | 0.34                    |
| N6-acetyllysine                | 0.34                    |
| 4-pyridoxate                   | 0.34                    |
| C3-DC-CH3 carnitine            | 0.33                    |
| pipecolic acid                 | 0.32                    |
| C6 carnitine                   | 0.31                    |
| taurine                        | 0.31                    |
| citrate                        | 0.31                    |
| adrenic acid                   | 0.30                    |
| 4-hydroxy-3-methylacetophenone | 0.30                    |
| C4 carnitine                   | 0.30                    |
| butyrylcarnitine               | 0.30                    |
| phosphocholine                 | 0.29                    |
| N-acetylleucine                | 0.29                    |
| oleic acid                     | 0.29                    |
| oleoyl glycine                 | 0.28                    |
| hypoxanthine                   | 0.28                    |
| niacinamide                    | 0.28                    |
| creatinine                     | 0.27                    |
| adenosine                      | 0.26                    |
| 5-HETE                         | 0.25                    |
| C18:1 SM                       | 0.24                    |
| indolelactate                  | 0.23                    |
| C12 carnitine                  | 0.23                    |
| C5:1 carnitine                 | 0.23                    |
| homocitrulline                 | 0.22                    |
| 12-HETE                        | 0.22                    |
| DMGV                           | 0.22                    |
| C7 carnitine                   | 0.22                    |
| xanthurenate                   | 0.22                    |
| homocystine                    | 0.21                    |
| C5-DC carnitine                | 0.21                    |
| suberate                       | 0.21                    |
| alanine                        | 0.21                    |
| docosatrienoic acid            | 0.20                    |
| uridine                        | 0.20                    |
| C3-DC carnitine                | 0.20                    |
| docosapentaenoic acid          | 0.19                    |
| C18:2 SM                       | 0.19                    |
| C10 carnitine                  | 0.19                    |



|                                      |      |
|--------------------------------------|------|
| pseudouridine                        | 0.18 |
| C8 carnitine                         | 0.18 |
| C14:0 LPC                            | 0.18 |
| N4-acetylcytidine                    | 0.17 |
| cytosine                             | 0.17 |
| uracil                               | 0.17 |
| pyridoxamine                         | 0.16 |
| 3-methylhistidine                    | 0.16 |
| C34:3 PE plasmalogen                 | 0.16 |
| beta-alanine                         | 0.16 |
| phenylalanine                        | 0.16 |
| C36:3 PE plasmalogen                 | 0.16 |
| 7-methylguanine                      | 0.16 |
| C18:0 SM                             | 0.16 |
| glucuronate                          | 0.15 |
| serine                               | 0.15 |
| C36:4 PE                             | 0.15 |
| taurocholic acid                     | 0.15 |
| C9 carnitine                         | 0.15 |
| choline                              | 0.15 |
| 15-HETE                              | 0.15 |
| lysine                               | 0.15 |
| dimethylglycine                      | 0.15 |
| citrulline                           | 0.15 |
| piperine                             | 0.14 |
| ectoine                              | 0.14 |
| acetyl glycine                       | 0.14 |
| 4-hydroxyhippurate                   | 0.14 |
| tryptophan                           | 0.14 |
| thymine                              | 0.14 |
| glutamate                            | 0.14 |
| methionine                           | 0.14 |
| C38:6 PE                             | 0.14 |
| sebacate                             | 0.13 |
| butyrobetaine                        | 0.13 |
| acetylcholine                        | 0.13 |
| caffeine                             | 0.13 |
| NMMA                                 | 0.13 |
| 5-acetylamino-6-amino-3-methyluracil | 0.13 |
| xanthine                             | 0.13 |
| N-acetyltryptophan                   | 0.13 |
| 2-aminooctanoate                     | 0.13 |
| hydroxyproline                       | 0.12 |
| 5-aminolevulinic acid                | 0.12 |
| alpha-glycerophosphocholine          | 0.12 |
| kynurenic acid                       | 0.12 |
| homogentisate                        | 0.12 |
| quinolinate                          | 0.12 |
| taurochenodeoxycholic acid           | 0.12 |
| 1-methylguanine                      | 0.12 |
| allantoin                            | 0.12 |
| taurodeoxycholic acid                | 0.11 |
| 4-hydroxymandelate                   | 0.11 |

|                                    |      |
|------------------------------------|------|
| betaine                            | 0.11 |
| 3-methyladipate-pimelate           | 0.11 |
| C16:0 LPC_B                        | 0.11 |
| guanine                            | 0.11 |
| 2-aminoadipate                     | 0.10 |
| inositol                           | 0.10 |
| N6,N6,N6-trimethyllysine           | 0.10 |
| alpha-ketoglutarate                | 0.10 |
| methylmalonate                     | 0.10 |
| C36:2 PS plasmalogen               | 0.10 |
| sphingosine                        | 0.10 |
| C38:4 PE                           | 0.10 |
| N1-methyl-2-pyridone-5-carboxamide | 0.10 |
| cortisol                           | 0.10 |
| aconitate                          | 0.10 |
| C18:3 LPC                          | 0.09 |
| pyroglutamic acid                  | 0.09 |
| N-acetylorithine                   | 0.09 |
| palmitic acid                      | 0.09 |
| guanidinoacetic acid               | 0.09 |
| xanthine                           | 0.09 |
| phenylacetylglutamine              | 0.09 |
| 3-hydroxyanthranilic acid          | 0.09 |
| mevalonic acid                     | 0.09 |
| valine                             | 0.09 |
| kynurenine                         | 0.09 |
| xanthosine                         | 0.08 |
| glutamine                          | 0.08 |
| 6,8-dihydroxypurine                | 0.08 |
| 4-acetamidobutanoate               | 0.08 |
| C22:6 LPE                          | 0.08 |
| indole-3-propionate                | 0.08 |
| proline betaine                    | 0.08 |
| N-methylproline                    | 0.08 |
| homovanillate                      | 0.07 |
| C-glycosyltryptophan               | 0.07 |
| isoleucine                         | 0.07 |
| pentose monophosphate              | 0.07 |
| ribothymidine                      | 0.07 |
| S-methyl-L-cysteine-S-oxide        | 0.07 |
| C38:6 PE plasmalogen               | 0.07 |
| hydroxyphenylacetate               | 0.07 |
| C38:6 PC plasmalogen               | 0.07 |
| creatine                           | 0.07 |
| C40:6 PE                           | 0.07 |
| C20:1 LPE                          | 0.07 |
| glycocholic acid                   | 0.06 |
| indoleacetic acid                  | 0.06 |
| SDMA                               | 0.06 |
| C18:0 LPC                          | 0.06 |
| docosahexaenoic acid               | 0.06 |
| glycodeoxycholic acid              | 0.06 |
| 1,7-dimethyluric acid              | 0.06 |

|                                          |      |
|------------------------------------------|------|
| urobilinogen                             | 0.06 |
| sorbitol                                 | 0.05 |
| GABA                                     | 0.05 |
| N-acetylputrescine                       | 0.05 |
| linoleic acid                            | 0.05 |
| linoleoyl ethanolamide                   | 0.05 |
| leucine                                  | 0.05 |
| C4-OH carnitine                          | 0.05 |
| C18:1 LPC plasmalogen_B                  | 0.05 |
| proline                                  | 0.05 |
| pantothenol                              | 0.05 |
| glycocholate                             | 0.05 |
| N-acetylalanine                          | 0.05 |
| C16 carnitine                            | 0.05 |
| histidine                                | 0.05 |
| C16:1 SM                                 | 0.05 |
| histamine                                | 0.05 |
| 1-methylhistamine                        | 0.04 |
| serotonin                                | 0.04 |
| C14 carnitine                            | 0.04 |
| C20:4 LPE                                | 0.04 |
| C38:5 PE plasmalogen                     | 0.04 |
| C26 carnitine                            | 0.04 |
| pantothenate                             | 0.04 |
| inosine                                  | 0.04 |
| C36:5 PE plasmalogen                     | 0.04 |
| stearic acid                             | 0.04 |
| C16:0 ceramide (d18:1)                   | 0.04 |
| C18:1 LPC plasmalogen_A                  | 0.04 |
| C16:0 SM                                 | 0.04 |
| urocanic acid                            | 0.04 |
| C36:3 PS plasmalogen                     | 0.03 |
| cotinine                                 | 0.03 |
| C20:0 LPE                                | 0.03 |
| C18:2 LPE                                | 0.03 |
| C2 carnitine                             | 0.03 |
| orotate                                  | 0.03 |
| hypotaurine                              | 0.03 |
| C18:1 LPE                                | 0.03 |
| C20:5 LPC                                | 0.03 |
| cinnamoylglycine                         | 0.03 |
| C18:1 carnitine                          | 0.03 |
| myristic acid                            | 0.03 |
| deoxycholic acid                         | 0.03 |
| methylimidazoleacetic acid               | 0.03 |
| N-carbamoyl-beta-alanine                 | 0.03 |
| C18:2 carnitine                          | 0.03 |
| 5-hydroxymethy-4-methyluracil            | 0.03 |
| glycodeoxycholate/glycochenodeoxycholate | 0.03 |
| 2-hydroxyglutarate                       | 0.03 |
| fumarate/maleate                         | 0.03 |
| putrescine                               | 0.02 |
| glycine                                  | 0.02 |

|                                |      |
|--------------------------------|------|
| adipate                        | 0.02 |
| C34:2 PE plasmalogen           | 0.02 |
| C30:0 PC                       | 0.02 |
| 8.11.14-Eicosatrienoic acid    | 0.02 |
| thiamine                       | 0.02 |
| C36:5 PC plasmalogen           | 0.02 |
| C16:0 LPE                      | 0.02 |
| C18:2 carnitine                | 0.02 |
| trimethylamine-N-oxide         | 0.02 |
| C34:2 PE                       | 0.02 |
| homoarginine                   | 0.02 |
| aminoisobutyric acid           | 0.02 |
| C16:1 LPC plasmalogen          | 0.02 |
| isocitrate                     | 0.02 |
| C12:1 carnitine                | 0.01 |
| C24:1 ceramide (d18:1)         | 0.01 |
| C18:1-OH carnitine             | 0.01 |
| C34:2 PC-B                     | 0.01 |
| C32:2 PC                       | 0.01 |
| glycochenodeoxycholic acid     | 0.01 |
| chenodeoxycholate/deoxycholate | 0.01 |
| 1-methylnicotinamide           | 0.01 |
| 1-methyladenosine              | 0.01 |
| cyclohexylamine                | 0.01 |
| 2-aminoheptanoic acid          | 0.01 |
| C38:7 PC plasmalogen           | 0.01 |
| salicylurate                   | 0.01 |
| eicosapentaenoic acid          | 0.01 |
| asparagine                     | 0.01 |
| C18:0 LPE                      | 0.01 |
| acetaminophen                  | 0.01 |
| glycolithocholic acid          | 0.01 |
| sphingosine 1-Phosphate        | 0.01 |
| methionine sulfoxide           | 0.01 |
| gamma-Linolenic acid           | 0.01 |
| C14:2 carnitine                | 0.01 |
| sucrose                        | 0.01 |
| C18 carnitine                  | 0.01 |
| N-acetylaspartic acid          | 0.01 |
| C20 carnitine                  | 0.01 |
| lactose                        | 0.01 |
| C34:2 DAG                      | 0.01 |
| ADP                            | 0.01 |
| cholic acid                    | 0.01 |
| acetyl-galactosamine           | 0.01 |
| N1-acetylspermidine            | 0.00 |
| cortisone                      | 0.00 |
| C20:4 LPC                      | 0.00 |
| sarcosine                      | 0.00 |
| tyrosine                       | 0.00 |
| imidazole propionate           | 0.00 |
| C16:1 LPC                      | 0.00 |
| 11-HETE                        | 0.00 |

|                                                    |      |
|----------------------------------------------------|------|
| C14:0 SM                                           | 0.00 |
| taurohyodeoxycholic acid/tauroursodeoxycholic acid | 0.00 |
| C38:7 PE plasmalogen                               | 0.00 |
| C22:6 LPC                                          | 0.00 |
| C40:7 PE plasmalogen                               | 0.00 |
| hippurate                                          | 0.00 |
| thyroxine                                          | 0.00 |
| fructose/glucose/galactose                         | 0.00 |
| C18:1 LPC_A                                        | 0.00 |
| gentisate                                          | 0.00 |
| C34:1 DAG                                          | 0.00 |
| C20:0 SM                                           | 0.00 |
| C22:5 LPC                                          | 0.00 |
| C34:1 DAG                                          | 0.00 |
| biliverdin                                         | 0.00 |
| chenodeoxycholic acid                              | 0.00 |
| glycoursodeoxycholic acid                          | 0.00 |
| ADMA                                               | 0.00 |
| threonine                                          | 0.00 |
| C34:3 PC plasmalogen                               | 0.00 |
| malate                                             | 0.00 |
| hydroxycotinine                                    | 0.00 |
| 1-methylguanosine                                  | 0.00 |
| glycodeoxycholate/glycochenodeoxycholate           | 0.00 |
| urate                                              | 0.00 |
| hypoxanthine                                       | 0.00 |
| arginine                                           | 0.00 |
| urate                                              | 0.00 |
| bilirubin                                          | 0.00 |
| 21-deoxycortisol                                   | 0.00 |
| C34:3 PC                                           | 0.00 |
| C14:1 carnitine                                    | 0.00 |
| 3-hydroxybenzoate                                  | 0.00 |
| C34:0 PE                                           | 0.00 |
| trigonelline                                       | 0.00 |
| succinate                                          | 0.00 |
| N-lauroylglycine                                   | 0.00 |
| C36:2 PE                                           | 0.00 |

**Supplemental Table 2.** Correlations ( $r^2$ ) between all venous proteins and arterial iFGF23

| <b>Protein</b>                      | <b>Protein full name</b>                        | <b><math>r^2</math></b> |
|-------------------------------------|-------------------------------------------------|-------------------------|
| Catalase                            | Catalase                                        | 0.71                    |
| Prostatic binding protein           | Phosphatidylethanolamine-binding protein 1      | 0.68                    |
| Peroxiredoxin-1                     | Peroxiredoxin-1                                 | 0.65                    |
| HCE004333                           | HCE004333                                       | 0.64                    |
| ULBP-3                              | NKG2D ligand 3                                  | 0.63                    |
| IL-20 Ra                            | Interleukin-20 receptor subunit alpha           | 0.63                    |
| PA2G4                               | Proliferation-associated protein 2G4            | 0.62                    |
| Myokinase, human                    | Adenylate kinase isoenzyme 1                    | 0.61                    |
| Rab GDP dissociation inhibitor beta | Rab GDP dissociation inhibitor beta             | 0.60                    |
| Carbonic anhydrase I                | Carbonic anhydrase 1                            | 0.60                    |
| IGFBP-5                             | Insulin-like growth factor-binding protein 5    | 0.58                    |
| UBE2N                               | Ubiquitin-conjugating enzyme E2 N               | 0.58                    |
| AREG                                | Amphiregulin                                    | 0.58                    |
| Triosephosphate isomerase           | Triosephosphate isomerase                       | 0.57                    |
| WNK3                                | Serine/threonine-protein kinase WNK3            | 0.57                    |
| SNAA                                | Alpha-soluble NSF attachment protein            | 0.56                    |
| MMP-7                               | Matrilysin                                      | 0.56                    |
| Transketolase                       | Transketolase                                   | 0.56                    |
| BAD                                 | Bcl2-associated agonist of cell death           | 0.55                    |
| UCRP                                | Ubiquitin-like protein ISG15                    | 0.54                    |
| IL-2 sRg                            | Cytokine receptor common subunit gamma          | 0.54                    |
| Cadherin-6                          | Cadherin-6                                      | 0.53                    |
| Peroxiredoxin-6                     | Peroxiredoxin-6                                 | 0.53                    |
| Ubiquitin+1                         | Ubiquitin+1, truncated mutation for UbB         | 0.53                    |
| FLRT1                               | Leucine-rich repeat transmembrane protein FLRT1 | 0.53                    |
| S100A6                              | Protein S100-A6                                 | 0.52                    |
| DAPK2                               | Death-associated protein kinase 2               | 0.51                    |
| Vasoactive Intestinal Peptide       | Vasoactive Intestinal Peptide                   | 0.50                    |
| SKP1                                | S-phase kinase-associated protein 1             | 0.50                    |
| PSA6                                | Proteasome subunit alpha type-6                 | 0.50                    |
| SE6L2                               | Seizure 6-like protein 2                        | 0.50                    |
| FGF-16                              | Fibroblast growth factor 16                     | 0.50                    |
| NUDC3                               | NudC domain-containing protein 3                | 0.49                    |
| IL-3 Ra                             | Interleukin-3 receptor subunit alpha            | 0.49                    |
| JAM-C                               | Junctional adhesion molecule C                  | 0.48                    |
| MDHC                                | Malate dehydrogenase, cytoplasmic               | 0.48                    |
| HINT1                               | Histidine triad nucleotide-binding protein 1    | 0.47                    |
| CYTD                                | Cystatin-D                                      | 0.47                    |
| MEPE                                | Matrix extracellular phosphoglycoprotein        | 0.46                    |
| IDE                                 | Insulin-degrading enzyme                        | 0.46                    |
| MRCKB                               | Serine/threonine-protein kinase MRCK beta       | 0.46                    |
| HCE000342                           | HCE000342                                       | 0.46                    |
| HDAC8                               | Histone deacetylase 8                           | 0.45                    |
| BCL2-like 1 protein                 | Bcl-2-like protein 1                            | 0.45                    |
| Albumin                             | Serum albumin                                   | 0.44                    |
| BRF-1                               | Transcription factor IIIB 90 kDa subunit        | 0.43                    |
| SPTA2                               | Spectrin alpha chain, non-erythrocytic 1        | 0.43                    |
| AMPK a1b1g1                         | AMP Kinase (alpha1beta1gamma1)                  | 0.42                    |
| Hemoglobin                          | Hemoglobin                                      | 0.42                    |
| Protein disulfide isomerase A3      | Protein disulfide-isomerase A3                  | 0.41                    |
| AGR2                                | Anterior gradient protein 2 homolog             | 0.41                    |

|                           |                                                          |      |
|---------------------------|----------------------------------------------------------|------|
| TSLP                      | Thymic stromal lymphopoietin                             | 0.41 |
| eIF-5A-1                  | Eukaryotic translation initiation factor 5A-1            | 0.41 |
| ARI3A                     | AT-rich interactive domain-containing protein 3A         | 0.41 |
| HXK1                      | Hexokinase-1                                             | 0.41 |
| RANK                      | Tumor necrosis factor receptor superfamily member 11A    | 0.41 |
| Calpain I                 | Calpain I                                                | 0.41 |
| UBC9                      | SUMO-conjugating enzyme UBC9                             | 0.41 |
| PAPP-A                    | Pappalysin-1                                             | 0.41 |
| DRG-1                     | Vacuolar protein sorting-associated protein VTA1 homolog | 0.40 |
| CEBPB                     | CCAAT/enhancer-binding protein beta                      | 0.40 |
| AIF1                      | Allograft inflammatory factor 1                          | 0.39 |
| HDGR2                     | Hepatoma-derived growth factor-related protein 2         | 0.39 |
| Galectin-4                | Galectin-4                                               | 0.39 |
| HMG1                      | Non-histone chromosomal protein HMG-14                   | 0.39 |
| Soggy-1                   | Dickkopf-like protein 1                                  | 0.39 |
| MK01                      | Mitogen-activated protein kinase 1                       | 0.39 |
| Cathepsin S               | Cathepsin S                                              | 0.38 |
| KPCI                      | Protein kinase C iota type                               | 0.38 |
| PolyUbiquitin K48         | PolyUbiquitin K48-linked                                 | 0.38 |
| ROBO3                     | Roundabout homolog 3                                     | 0.37 |
| TIG2                      | Retinoic acid receptor responder protein 2               | 0.37 |
| Cytidylate kinase         | UMP-CMP kinase                                           | 0.37 |
| MIA                       | Melanoma-derived growth regulatory protein               | 0.37 |
| HCE000414                 | HCE000414                                                | 0.36 |
| Cripto                    | Teratocarcinoma-derived growth factor 1                  | 0.36 |
| FST                       | Follistatin                                              | 0.36 |
| ARMEL                     | Cerebral dopamine neurotrophic factor                    | 0.36 |
| MCP-1                     | C-C motif chemokine 2                                    | 0.36 |
| IGFBP-4                   | Insulin-like growth factor-binding protein 4             | 0.36 |
| CYTN                      | Cystatin-SN                                              | 0.36 |
| 3HAO                      | 3-hydroxyanthranilate 3,4-dioxygenase                    | 0.35 |
| Clusterin                 | Clusterin                                                | 0.35 |
| GI24                      | Platelet receptor Gi24                                   | 0.35 |
| C34 gp41 HIV Fragment     | gp41 C34 peptide, HIV                                    | 0.35 |
| C3d                       | Complement C3d fragment                                  | 0.35 |
| OLR1                      | Oxidized low-density lipoprotein receptor 1              | 0.35 |
| CPNE1                     | Copine-1                                                 | 0.35 |
| PSA2                      | Proteasome subunit alpha type-2                          | 0.34 |
| KREM2                     | Kremen protein 2                                         | 0.34 |
| 14-3-3 protein beta/alpha | 14-3-3 protein beta/alpha                                | 0.34 |
| a-Synuclein               | Alpha-synuclein                                          | 0.34 |
| IFN-lambda 1              | Interferon lambda-1                                      | 0.34 |
| RSK-like protein kinase   | Ribosomal protein S6 kinase alpha-5                      | 0.34 |
| SUMO3                     | Small ubiquitin-related modifier 3                       | 0.34 |
| CFC1                      | Cryptic protein                                          | 0.34 |
| Flt-3                     | Receptor-type tyrosine-protein kinase FLT3               | 0.34 |
| PIGR                      | Polymeric immunoglobulin receptor                        | 0.34 |
| GPC2                      | Glypican-2                                               | 0.34 |
| Somatostatin-28           | Somatostatin-28                                          | 0.33 |
| IL-1F8                    | Interleukin-36 beta                                      | 0.33 |
| 14-3-3 protein theta      | 14-3-3 protein theta                                     | 0.33 |
| TSLP R                    | Cytokine receptor-like factor 2                          | 0.33 |
| HCE003183                 | HCE003183                                                | 0.33 |

|                                 |                                                                   |      |
|---------------------------------|-------------------------------------------------------------------|------|
| Cyclophilin A                   | Peptidyl-prolyl cis-trans isomerase A                             | 0.33 |
| SLPI                            | Antileukoproteinase                                               | 0.33 |
| MMEL2                           | Membrane metallo-endopeptidase-like 1                             | 0.33 |
| TNF-a                           | Tumor necrosis factor                                             | 0.32 |
| EPHA3                           | Ephrin type-A receptor 3                                          | 0.32 |
| SPHK2                           | Sphingosine kinase 2                                              | 0.32 |
| Ephrin-A3                       | Ephrin-A3                                                         | 0.32 |
| Sialoadhesin                    | Sialoadhesin                                                      | 0.32 |
| HSP70 protein 8                 | Heat shock cognate 71 kDa protein                                 | 0.32 |
| ING1                            | Inhibitor of growth protein 1                                     | 0.32 |
| Nucleoside diphosphate kinase A | Nucleoside diphosphate kinase A                                   | 0.32 |
| CDC37                           | Hsp90 co-chaperone Cdc37                                          | 0.32 |
| Stress-induced-phosphoprotein 1 | Stress-induced-phosphoprotein 1                                   | 0.32 |
| Renin                           | Renin                                                             | 0.31 |
| NAGK                            | N-acetyl-D-glucosamine kinase                                     | 0.31 |
| GFAP                            | Glial fibrillary acidic protein                                   | 0.31 |
| OBCAM                           | Opioid-binding protein/cell adhesion molecule                     | 0.31 |
| ADAMTS-5                        | A disintegrin and metalloproteinase with thrombospondin motifs 5  | 0.31 |
| FGF-6                           | Fibroblast growth factor 6                                        | 0.31 |
| Granzyme B                      | Granzyme B                                                        | 0.30 |
| GCKR                            | Glucokinase regulatory protein                                    | 0.30 |
| hnRNP A/B                       | Heterogeneous nuclear ribonucleoprotein A/B                       | 0.30 |
| RSPO2                           | R-spondin-2                                                       | 0.30 |
| CD40 ligand, soluble            | CD40 ligand                                                       | 0.29 |
| DLC8                            | Dynein light chain 1, cytoplasmic                                 | 0.29 |
| DPP2                            | Dipeptidyl peptidase 2                                            | 0.29 |
| CD22                            | B-cell receptor CD22                                              | 0.29 |
| PDE3A                           | cGMP-inhibited 3',5'-cyclic phosphodiesterase A                   | 0.29 |
| HCE004152                       | HCE004152                                                         | 0.29 |
| PSME1                           | Proteasome activator complex subunit 1                            | 0.29 |
| Azurocidin                      | Azurocidin                                                        | 0.29 |
| Marapsin                        | Serine protease 27                                                | 0.29 |
| Calcineurin B a                 | Calcineurin subunit B type 1                                      | 0.29 |
| CAMK1D                          | Calcium/calmodulin-dependent protein kinase type 1D               | 0.29 |
| K-ras                           | GTPase KRas                                                       | 0.29 |
| LG3BP                           | Galectin-3-binding protein                                        | 0.29 |
| Ubiquitin                       | Ubiquitin                                                         | 0.29 |
| CYTT                            | Cystatin-SA                                                       | 0.28 |
| ATS15                           | A disintegrin and metalloproteinase with thrombospondin motifs 15 | 0.28 |
| BMP-7                           | Bone morphogenetic protein 7                                      | 0.28 |
| Kallistatin                     | Kallistatin                                                       | 0.28 |
| STAT1                           | Signal transducer and activator of transcription 1-alpha/beta     | 0.28 |
| Caspase-2                       | Caspase-2                                                         | 0.28 |
| Plasmin                         | Plasmin                                                           | 0.28 |
| IL-10 Ra                        | Interleukin-10 receptor subunit alpha                             | 0.28 |
| IL-11                           | Interleukin-11                                                    | 0.28 |
| 40S ribosomal protein SA        | 40S ribosomal protein SA                                          | 0.28 |
| GPDA                            | Glycerol-3-phosphate dehydrogenase [NAD(+)], cytoplasmic          | 0.28 |
| CgA                             | Chromogranin-A                                                    | 0.28 |
| IDS                             | Iduronate 2-sulfatase                                             | 0.28 |
| IL-18 Rb                        | Interleukin-18 receptor accessory protein                         | 0.28 |
| ETHE1                           | Persulfide dioxygenase ETHE1, mitochondrial                       | 0.28 |
| JNK2                            | Mitogen-activated protein kinase 9                                | 0.27 |



|                                 |                                                              |      |
|---------------------------------|--------------------------------------------------------------|------|
| Nectin-like protein 1           | Cell adhesion molecule 3                                     | 0.27 |
| IL-3                            | Interleukin-3                                                | 0.27 |
| Moesin                          | Moesin                                                       | 0.27 |
| Survivin                        | Baculoviral IAP repeat-containing protein 5                  | 0.27 |
| Thymidine kinase                | Thymidine kinase, cytosolic                                  | 0.27 |
| Aflatoxin B1 aldehyde reductase | Aflatoxin B1 aldehyde reductase member 2                     | 0.27 |
| SMAD3                           | Mothers against decapentaplegic homolog 3                    | 0.27 |
| IL-12 Rb1                       | Interleukin-12 receptor subunit beta-1                       | 0.27 |
| Cystatin C                      | Cystatin-C                                                   | 0.27 |
| LEG9                            | Galectin-9                                                   | 0.27 |
| MIP-1a                          | C-C motif chemokine 3                                        | 0.27 |
| FGFR-3                          | Fibroblast growth factor receptor 3                          | 0.27 |
| Carbonic Anhydrase X            | Carbonic anhydrase-related protein 10                        | 0.27 |
| JAM-B                           | Junctional adhesion molecule B                               | 0.26 |
| Angiogenin                      | Angiogenin                                                   | 0.26 |
| DRAK2                           | Serine/threonine-protein kinase 17B                          | 0.26 |
| RBP                             | Retinol-binding protein 4                                    | 0.26 |
| UB2L3                           | Ubiquitin-conjugating enzyme E2 L3                           | 0.26 |
| Bcl-2                           | Apoptosis regulator Bcl-2                                    | 0.26 |
| FGF9                            | Fibroblast growth factor 9                                   | 0.26 |
| LGMN                            | Legumain                                                     | 0.26 |
| BCAR3                           | Breast cancer anti-estrogen resistance protein 3             | 0.26 |
| FAM3B                           | Protein FAM3B                                                | 0.26 |
| GV                              | Calcium-dependent phospholipase A2                           | 0.26 |
| BGN                             | Biglycan                                                     | 0.26 |
| CD226                           | CD226 antigen                                                | 0.26 |
| Angiopoietin-4                  | Angiopoietin-4                                               | 0.26 |
| ERK-1                           | Mitogen-activated protein kinase 3                           | 0.26 |
| CLC7A                           | C-type lectin domain family 7 member A                       | 0.26 |
| Macrophage scavenger receptor   | Macrophage scavenger receptor types I and II                 | 0.25 |
| Lectin, mannose-binding 2       | Vesicular integral-membrane protein VIP36                    | 0.25 |
| a2-HS-Glycoprotein              | Alpha-2-HS-glycoprotein                                      | 0.25 |
| Adrenomedullin                  | Adrenomedullin                                               | 0.25 |
| DYRK3                           | Dual specificity tyrosine-phosphorylation-regulated kinase 3 | 0.25 |
| Alpha enolase                   | Alpha-enolase                                                | 0.25 |
| Nogo Receptor                   | Reticulon-4 receptor                                         | 0.25 |
| MMP-16                          | Matrix metalloproteinase-16                                  | 0.25 |
| GAPDH, liver                    | Glyceraldehyde-3-phosphate dehydrogenase                     | 0.24 |
| PSD7                            | 26S proteasome non-ATPase regulatory subunit 7               | 0.24 |
| IL-4                            | Interleukin-4                                                | 0.24 |
| GHC2                            | Mitochondrial glutamate carrier 2                            | 0.24 |
| ABL2                            | Abelson tyrosine-protein kinase 2                            | 0.24 |
| Carbonic anhydrase 6            | Carbonic anhydrase 6                                         | 0.24 |
| HCE001796                       | HCE001796                                                    | 0.24 |
| PIANP                           | PILR alpha-associated neural protein                         | 0.24 |
| HXK2                            | Hexokinase-2                                                 | 0.24 |
| BMPRI1A                         | Bone morphogenetic protein receptor type-1A                  | 0.24 |
| annexin I                       | Annexin A1                                                   | 0.24 |
| SOST                            | Sclerostin                                                   | 0.24 |
| CONA1                           | Collagen alpha-1(XXIII) chain                                | 0.24 |
| STAT6                           | Signal transducer and activator of transcription 6           | 0.24 |
| eIF-5                           | Eukaryotic translation initiation factor 5                   | 0.24 |
| Eotaxin                         | Eotaxin                                                      | 0.23 |

|                                  |                                                                  |      |
|----------------------------------|------------------------------------------------------------------|------|
| iC3b                             | Complement C3b, inactivated                                      | 0.23 |
| SOD                              | Superoxide dismutase [Cu-Zn]                                     | 0.23 |
| RAN                              | GTP-binding nuclear protein Ran                                  | 0.23 |
| PDE11                            | Dual 3',5'-cyclic-AMP and -GMP phosphodiesterase 11A             | 0.23 |
| Collectin Kidney 1               | Collectin-11                                                     | 0.23 |
| ARP19                            | cAMP-regulated phosphoprotein 19                                 | 0.23 |
| sCD4                             | T-cell surface glycoprotein CD4                                  | 0.23 |
| PGCB                             | Brevican core protein                                            | 0.23 |
| IMDH2                            | Inosine-5'-monophosphate dehydrogenase 2                         | 0.23 |
| Chymase                          | Chymase                                                          | 0.23 |
| GOT1                             | Aspartate aminotransferase, cytoplasmic                          | 0.23 |
| IL-12                            | Interleukin-12                                                   | 0.23 |
| Dynactin subunit 2               | Dynactin subunit 2                                               | 0.22 |
| C1q                              | Complement C1q subcomponent                                      | 0.22 |
| SH21A                            | SH2 domain-containing protein 1A                                 | 0.22 |
| 4-1BB ligand                     | Tumor necrosis factor ligand superfamily member 9                | 0.22 |
| Cystatin M                       | Cystatin-M                                                       | 0.22 |
| 6-Phosphogluconate dehydrogenase | 6-phosphogluconate dehydrogenase, decarboxylating                | 0.22 |
| VEGF-D                           | Vascular endothelial growth factor D                             | 0.22 |
| phosphoglycerate kinase 1        | Phosphoglycerate kinase 1                                        | 0.22 |
| HCC-4                            | C-C motif chemokine 16                                           | 0.22 |
| 17-beta-HSD 1                    | Estradiol 17-beta-dehydrogenase 1                                | 0.22 |
| CK-BB                            | Creatine kinase B-type                                           | 0.22 |
| IL-2                             | Interleukin-2                                                    | 0.22 |
| ABL1                             | Tyrosine-protein kinase ABL1                                     | 0.22 |
| SET                              | Protein SET                                                      | 0.21 |
| IFNA7                            | Interferon alpha-7                                               | 0.21 |
| TFF3                             | Trefoil factor 3                                                 | 0.21 |
| IF4A3                            | Eukaryotic initiation factor 4A-III                              | 0.21 |
| DnaJ homolog                     | Mitochondrial import inner membrane translocase subunit TIM14    | 0.21 |
| Kallikrein 4                     | Kallikrein-4                                                     | 0.21 |
| PUR8                             | Adenylosuccinate lyase                                           | 0.21 |
| KEAP1                            | Kelch-like ECH-associated protein 1                              | 0.21 |
| TBK1                             | Serine/threonine-protein kinase TBK1                             | 0.21 |
| BID                              | BH3-interacting domain death agonist                             | 0.21 |
| S100A12                          | Protein S100-A12                                                 | 0.20 |
| MAPKAPK3                         | MAP kinase-activated protein kinase 3                            | 0.20 |
| CD27                             | CD27 antigen                                                     | 0.20 |
| ALK-1                            | Serine/threonine-protein kinase receptor R3                      | 0.20 |
| AIP                              | AH receptor-interacting protein                                  | 0.20 |
| MBL                              | Mannose-binding protein C                                        | 0.20 |
| CTACK                            | C-C motif chemokine 27                                           | 0.20 |
| GRB2-related adapter protein 2   | GRB2-related adapter protein 2                                   | 0.20 |
| p27Kip1                          | Cyclin-dependent kinase inhibitor 1B                             | 0.20 |
| ADAM12                           | Disintegrin and metalloproteinase domain-containing protein 12   | 0.20 |
| CaMKK alpha                      | Calcium/calmodulin-dependent protein kinase 1                    | 0.20 |
| ATS1                             | A disintegrin and metalloproteinase with thrombospondin motifs 1 | 0.20 |
| CSK21                            | Casein kinase II subunit alpha                                   | 0.20 |
| Proteinase-3                     | Myeloblastin                                                     | 0.20 |
| HSP 70                           | Heat shock 70 kDa protein 1A                                     | 0.20 |
| RPS6KA3                          | Ribosomal protein S6 kinase alpha-3                              | 0.20 |
| Elafin                           | Elafin                                                           | 0.20 |
| hnRNP A2/B1                      | Heterogeneous nuclear ribonucleoproteins A2/B1                   | 0.20 |

|                     |                                                               |      |
|---------------------|---------------------------------------------------------------|------|
| HGFA                | Hepatocyte growth factor activator                            | 0.20 |
| Activated Protein C | Activated Protein C                                           | 0.20 |
| NovH                | Protein NOV homolog                                           | 0.20 |
| HEMK2               | HemK methyltransferase family member 2                        | 0.20 |
| calreticulin        | Calreticulin                                                  | 0.19 |
| LY86                | Lymphocyte antigen 86                                         | 0.19 |
| SLAF5               | SLAM family member 5                                          | 0.19 |
| kallikrein 14       | Kallikrein-14                                                 | 0.19 |
| IL-1F7              | Interleukin-37                                                | 0.19 |
| c-Jun               | Transcription factor AP-1                                     | 0.19 |
| GP114               | Adhesion G-protein coupled receptor G5                        | 0.19 |
| DHH                 | Desert hedgehog protein N-product                             | 0.19 |
| TMA                 | Thyroid peroxidase                                            | 0.19 |
| HIV-2 Rev           | Protein Rev_HV2BE                                             | 0.19 |
| JAML1               | Junctional adhesion molecule-like                             | 0.19 |
| BASI                | Basigin                                                       | 0.19 |
| ENTP3               | Ectonucleoside triphosphate diphosphohydrolase 3              | 0.19 |
| HMGR                | 3-hydroxy-3-methylglutaryl-coenzyme A reductase               | 0.19 |
| GREM1               | Gremlin-1                                                     | 0.19 |
| PIAS4               | E3 SUMO-protein ligase PIAS4                                  | 0.19 |
| Adiponectin         | Adiponectin                                                   | 0.19 |
| IGFBP-6             | Insulin-like growth factor-binding protein 6                  | 0.19 |
| FGF-4               | Fibroblast growth factor 4                                    | 0.18 |
| Lactoferrin         | Lactotransferrin                                              | 0.18 |
| Mcl-1               | Induced myeloid leukemia cell differentiation protein Mcl-1   | 0.18 |
| Activin A           | Inhibin beta A chain                                          | 0.18 |
| VEGF sR3            | Vascular endothelial growth factor receptor 3                 | 0.18 |
| ADAM 9              | Disintegrin and metalloproteinase domain-containing protein 9 | 0.18 |
| Neurotrophin-5      | Neurotrophin-4                                                | 0.18 |
| Stanniocalcin-1     | Stanniocalcin-1                                               | 0.18 |
| Granzyme H          | Granzyme H                                                    | 0.18 |
| GA733-1 protein     | Tumor-associated calcium signal transducer 2                  | 0.18 |
| FCGR1               | High affinity immunoglobulin gamma Fc receptor I              | 0.18 |
| TACI                | Tumor necrosis factor receptor superfamily member 13B         | 0.18 |
| sRANKL              | Tumor necrosis factor ligand superfamily member 11            | 0.18 |
| SECTM1              | Secreted and transmembrane protein 1                          | 0.18 |
| BOC                 | Brother of CDO                                                | 0.18 |
| Mammaglobin 2       | Mammaglobin-B                                                 | 0.18 |
| IMDH1               | Inosine-5'-monophosphate dehydrogenase 1                      | 0.18 |
| IL-8                | Interleukin-8                                                 | 0.18 |
| Kallikrein 7        | Kallikrein-7                                                  | 0.18 |
| Apo A-I             | Apolipoprotein A-I                                            | 0.18 |
| Topoisomerase I     | DNA topoisomerase 1                                           | 0.18 |
| Semaphorin-6A       | Semaphorin-6A                                                 | 0.18 |
| NRP1                | Neuropilin-1                                                  | 0.18 |
| IRF1                | Interferon regulatory factor 1                                | 0.18 |
| Elastase            | Neutrophil elastase                                           | 0.18 |
| VAV                 | Proto-oncogene vav                                            | 0.18 |
| M2-PK               | Pyruvate kinase PKM                                           | 0.18 |
| CDK2/cyclin A       | Cyclin-dependent kinase 2:Cyclin-A2 complex                   | 0.18 |
| TEC                 | Tyrosine-protein kinase Tec                                   | 0.18 |
| HSP 90a/b           | Heat shock protein HSP 90-alpha/beta                          | 0.18 |
| HMG-1               | High mobility group protein B1                                | 0.17 |

|                             |                                                                  |      |
|-----------------------------|------------------------------------------------------------------|------|
| Galectin-2                  | Galectin-2                                                       | 0.17 |
| SLIK1                       | SLIT and NTRK-like protein 1                                     | 0.17 |
| HSP 40                      | DnaJ homolog subfamily B member 1                                | 0.17 |
| Semaphorin 3A               | Semaphorin-3A                                                    | 0.17 |
| STX1a                       | Syntaxin-1A                                                      | 0.17 |
| MP2K2                       | Dual specificity mitogen-activated protein kinase 2              | 0.17 |
| PTHrP                       | Parathyroid hormone-related protein                              | 0.17 |
| TCTP                        | Translationally-controlled tumor protein                         | 0.17 |
| GDF-9                       | Growth/differentiation factor 9                                  | 0.17 |
| ICOS                        | Inducible T-cell costimulator                                    | 0.17 |
| PAK7                        | Serine/threonine-protein kinase PAK 7                            | 0.17 |
| Calcineurin                 | Calcineurin                                                      | 0.17 |
| ER                          | Estrogen receptor                                                | 0.17 |
| PIK3CA/PIK3R1               | PIK3CA/PIK3R1                                                    | 0.17 |
| G-CSF-R                     | Granulocyte colony-stimulating factor receptor                   | 0.17 |
| CD109                       | CD109 antigen                                                    | 0.17 |
| ARSB                        | Arylsulfatase B                                                  | 0.17 |
| TRAIL R4                    | Tumor necrosis factor receptor superfamily member 10D            | 0.17 |
| FGF-17                      | Fibroblast growth factor 17                                      | 0.17 |
| bFGF                        | Fibroblast growth factor 2                                       | 0.17 |
| DBNL                        | Drebrin-like protein                                             | 0.17 |
| TRY3                        | Trypsin-3                                                        | 0.17 |
| EPO-R                       | Erythropoietin receptor                                          | 0.17 |
| sICAM-3                     | Intercellular adhesion molecule 3                                | 0.17 |
| CNTN2                       | Contactin-2                                                      | 0.17 |
| FABPE                       | Fatty acid-binding protein, epidermal                            | 0.17 |
| FGF-8B                      | Fibroblast growth factor 8 isoform B                             | 0.17 |
| RXFP1                       | Relaxin receptor 1                                               | 0.17 |
| Protein disulfide-isomerase | Protein disulfide-isomerase                                      | 0.16 |
| PACAP-27                    | Pituitary adenylate cyclase-activating polypeptide 27            | 0.16 |
| EphA5                       | Ephrin type-A receptor 5                                         | 0.16 |
| b-Endorphin                 | Beta-endorphin                                                   | 0.16 |
| PKC-D                       | Protein kinase C delta type                                      | 0.16 |
| SEM6B                       | Semaphorin-6B                                                    | 0.16 |
| uPA                         | Urokinase-type plasminogen activator                             | 0.16 |
| 3HIDH                       | 3-hydroxyisobutyrate dehydrogenase, mitochondrial                | 0.16 |
| GSK-3 alpha/beta            | Glycogen synthase kinase-3 alpha/beta                            | 0.16 |
| IL24                        | Interleukin-24                                                   | 0.16 |
| sE-Selectin                 | E-selectin                                                       | 0.16 |
| Ephrin-A4                   | Ephrin-A4                                                        | 0.16 |
| PKC-G                       | Protein kinase C gamma type                                      | 0.16 |
| HGH                         | Somatotropin                                                     | 0.16 |
| a2-Antiplasmin              | Alpha-2-antiplasmin                                              | 0.16 |
| MFRP                        | Membrane frizzled-related protein                                | 0.16 |
| IFN-a/b R1                  | Interferon alpha/beta receptor 1                                 | 0.16 |
| ADAMTS-4                    | A disintegrin and metalloproteinase with thrombospondin motifs 4 | 0.16 |
| c-Myc                       | Myc proto-oncogene protein                                       | 0.15 |
| EPHAA                       | Ephrin type-A receptor 10                                        | 0.15 |
| 4EBP2                       | Eukaryotic translation initiation factor 4E-binding protein 2    | 0.15 |
| Apo E                       | Apolipoprotein E                                                 | 0.15 |
| sLRP1                       | Low-density lipoprotein receptor-related protein 1, soluble      | 0.15 |
| MAPK14                      | Mitogen-activated protein kinase 14                              | 0.15 |
| YKL-40                      | Chitinase-3-like protein 1                                       | 0.15 |

|                                          |                                                                  |      |
|------------------------------------------|------------------------------------------------------------------|------|
| NR1D1                                    | Nuclear receptor subfamily 1 group D member 1                    | 0.15 |
| HPLN1                                    | Hyaluronan and proteoglycan link protein 1                       | 0.15 |
| Osteopontin                              | Osteopontin                                                      | 0.15 |
| EP15R                                    | Epidermal growth factor receptor substrate 15-like 1             | 0.15 |
| Afamin                                   | Afamin                                                           | 0.15 |
| MSP R                                    | Macrophage-stimulating protein receptor                          | 0.15 |
| RELT                                     | Tumor necrosis factor receptor superfamily member 19L            | 0.15 |
| P-Selectin                               | P-selectin                                                       | 0.15 |
| LIMP II                                  | Lysosome membrane protein 2                                      | 0.15 |
| ACTH                                     | Corticotropin                                                    | 0.15 |
| Cofilin-1                                | Cofilin-1                                                        | 0.15 |
| FGF-12                                   | Fibroblast growth factor 12                                      | 0.15 |
| NANOG                                    | Homeobox protein NANOG                                           | 0.15 |
| transcription factor MLR1, isoform CRA_b | Ligand-dependent nuclear receptor corepressor-like protein       | 0.15 |
| S100A4                                   | Protein S100-A4                                                  | 0.15 |
| CD59                                     | CD59 glycoprotein                                                | 0.14 |
| Glucocorticoid receptor                  | Glucocorticoid receptor                                          | 0.14 |
| TLR4:MD-2 complex                        | Toll-like receptor 4:Lymphocyte antigen 96 complex               | 0.14 |
| TWEAKR                                   | Tumor necrosis factor receptor superfamily member 12A            | 0.14 |
| Fucosyltransferase 3                     | Galactoside 3(4)-L-fucosyltransferase                            | 0.14 |
| PLPP                                     | Pyridoxal phosphate phosphatase                                  | 0.14 |
| FCN2                                     | Ficolin-2                                                        | 0.14 |
| Carbonic anhydrase VII                   | Carbonic anhydrase 7                                             | 0.14 |
| SP-D                                     | Pulmonary surfactant-associated protein D                        | 0.14 |
| sICAM-5                                  | Intercellular adhesion molecule 5                                | 0.14 |
| Cathepsin G                              | Cathepsin G                                                      | 0.14 |
| FLRT3                                    | Leucine-rich repeat transmembrane protein FLRT3                  | 0.14 |
| Eotaxin-3                                | C-C motif chemokine 26                                           | 0.14 |
| TNR4                                     | Tumor necrosis factor receptor superfamily member 4              | 0.14 |
| MMP-12                                   | Macrophage metalloelastase                                       | 0.14 |
| HB-EGF                                   | Heparin-binding EGF-like growth factor                           | 0.14 |
| RNase H1                                 | Ribonuclease H1                                                  | 0.14 |
| eIF-4H                                   | Eukaryotic translation initiation factor 4H                      | 0.14 |
| BMP-14                                   | Growth/differentiation factor 5                                  | 0.14 |
| LY9                                      | T-lymphocyte surface antigen Ly-9                                | 0.14 |
| IFN10                                    | Interferon alpha-10                                              | 0.14 |
| SLAF7                                    | SLAM family member 7                                             | 0.14 |
| PAFAH beta subunit                       | Platelet-activating factor acetylhydrolase IB subunit beta       | 0.14 |
| IL-16                                    | Interleukin-16                                                   | 0.14 |
| PGRP-S                                   | Peptidoglycan recognition protein 1                              | 0.13 |
| CSRP3                                    | Cysteine and glycine-rich protein 3                              | 0.13 |
| Prothrombin                              | Prothrombin                                                      | 0.13 |
| FCG2B                                    | Low affinity immunoglobulin gamma Fc region receptor II-b        | 0.13 |
| CDK1/cyclin B                            | Cyclin-dependent kinase 1:G2/mitotic-specific cyclin-B1 complex  | 0.13 |
| CBG                                      | Corticosteroid-binding globulin                                  | 0.13 |
| HO-2                                     | Heme oxygenase 2                                                 | 0.13 |
| PIM1                                     | Serine/threonine-protein kinase pim-1                            | 0.13 |
| Histone H1.2                             | Histone H1.2                                                     | 0.13 |
| RANTES                                   | C-C motif chemokine 5                                            | 0.13 |
| HIF-1a                                   | Hypoxia-inducible factor 1-alpha                                 | 0.13 |
| Protein C                                | Vitamin K-dependent protein C                                    | 0.13 |
| CAMK2B                                   | Calcium/calmodulin-dependent protein kinase type II subunit beta | 0.13 |
| MATK                                     | Megakaryocyte-associated tyrosine-protein kinase                 | 0.13 |

|                                  |                                                                                |      |
|----------------------------------|--------------------------------------------------------------------------------|------|
| CTGF                             | Connective tissue growth factor                                                | 0.13 |
| CD83                             | CD83 antigen                                                                   | 0.13 |
| PKC-Z                            | Protein kinase C zeta type                                                     | 0.13 |
| KIF23                            | Kinesin-like protein KIF23                                                     | 0.13 |
| BMPER                            | BMP-binding endothelial regulator protein                                      | 0.13 |
| DEAD-box protein 19B             | ATP-dependent RNA helicase DDX19B                                              | 0.13 |
| Cathepsin B                      | Cathepsin B                                                                    | 0.13 |
| CAD15                            | Cadherin-15                                                                    | 0.13 |
| Cytochrome P450 3A4              | Cytochrome P450 3A4                                                            | 0.13 |
| PCI                              | Plasma serine protease inhibitor                                               | 0.13 |
| Thrombin                         | Thrombin                                                                       | 0.13 |
| PPIB                             | Peptidyl-prolyl cis-trans isomerase B                                          | 0.13 |
| IGF-I                            | Insulin-like growth factor I                                                   | 0.13 |
| IFN-lambda 2                     | Interferon lambda-2                                                            | 0.13 |
| KI2L4                            | Killer cell immunoglobulin-like receptor 2DL4                                  | 0.13 |
| Coagulation Factor X             | Coagulation Factor X                                                           | 0.13 |
| alpha-1-antichymotrypsin complex | Alpha-1-antichymotrypsin complex                                               | 0.12 |
| CATE                             | Cathepsin E                                                                    | 0.12 |
| PDK1                             | [Pyruvate dehydrogenase (acetyl-transferring)] kinase isozyme 1, mitochondrial | 0.12 |
| NACA                             | Nascent polypeptide-associated complex subunit alpha                           | 0.12 |
| UBP25                            | Ubiquitin carboxyl-terminal hydrolase 25                                       | 0.12 |
| BARK1                            | beta-adrenergic receptor kinase 1                                              | 0.12 |
| b2-Microglobulin                 | Beta-2-microglobulin                                                           | 0.12 |
| PACAP-38                         | Pituitary adenylate cyclase-activating polypeptide 38                          | 0.12 |
| LDH-H 1                          | L-lactate dehydrogenase B chain                                                | 0.12 |
| MIP-3b                           | C-C motif chemokine 19                                                         | 0.12 |
| NG36                             | Histone-lysine N-methyltransferase EHMT2                                       | 0.12 |
| Angiotensinogen                  | Angiotensinogen                                                                | 0.12 |
| MIP-5                            | C-C motif chemokine 15                                                         | 0.12 |
| SPINT2                           | Kunitz-type protease inhibitor 2                                               | 0.12 |
| VEGF121                          | Vascular endothelial growth factor A, isoform 121                              | 0.12 |
| PTP-1C                           | Tyrosine-protein phosphatase non-receptor type 6                               | 0.12 |
| PDGF-AA                          | Platelet-derived growth factor subunit A                                       | 0.12 |
| AK1A1                            | Alcohol dehydrogenase [NADP(+)]                                                | 0.12 |
| PECAM-1                          | Platelet endothelial cell adhesion molecule                                    | 0.12 |
| RS3                              | 40S ribosomal protein S3                                                       | 0.12 |
| FCRL3                            | Fc receptor-like protein 3                                                     | 0.12 |
| VEGF-C                           | Vascular endothelial growth factor C                                           | 0.12 |
| ARG11                            | Arginase-1                                                                     | 0.12 |
| NCAM-L1                          | Neural cell adhesion molecule L1                                               | 0.12 |
| NEUREGULIN-1                     | Neuregulin-1                                                                   | 0.11 |
| Endoglin                         | Endoglin                                                                       | 0.11 |
| ghrelin                          | Appetite-regulating hormone                                                    | 0.11 |
| IL-17E                           | Interleukin-25                                                                 | 0.11 |
| IGFBP-7                          | Insulin-like growth factor-binding protein 7                                   | 0.11 |
| Thrombopoietin Receptor          | Thrombopoietin Receptor                                                        | 0.11 |
| EF-1-beta                        | Elongation factor 1-beta                                                       | 0.11 |
| MP2K4                            | Dual specificity mitogen-activated protein kinase 4                            | 0.11 |
| H31                              | Histone H3.1                                                                   | 0.11 |
| AN32B                            | Acidic leucine-rich nuclear phosphoprotein 32 family member B                  | 0.11 |
| STAT3                            | Signal transducer and activator of transcription 3                             | 0.11 |
| PSA                              | Prostate-specific antigen                                                      | 0.11 |
| HCE004331                        | HCE004331                                                                      | 0.11 |

|                           |                                                                           |      |
|---------------------------|---------------------------------------------------------------------------|------|
| GPVI                      | Platelet glycoprotein VI                                                  | 0.11 |
| LRRK2                     | Leucine-rich repeat serine/threonine-protein kinase 2                     | 0.11 |
| Factor D                  | Complement factor D                                                       | 0.11 |
| CD97                      | CD97 antigen                                                              | 0.11 |
| MAPK5                     | MAP kinase-activated protein kinase 5                                     | 0.11 |
| NKp44                     | Natural cytotoxicity triggering receptor 2                                | 0.11 |
| ON                        | SPARC                                                                     | 0.11 |
| TS                        | Thymidylate synthase                                                      | 0.11 |
| Apo E3                    | Apolipoprotein E (isoform E3)                                             | 0.11 |
| LIN7B                     | Protein lin-7 homolog B                                                   | 0.11 |
| FGFR-2                    | Fibroblast growth factor receptor 2                                       | 0.11 |
| NKp46                     | Natural cytotoxicity triggering receptor 1                                | 0.11 |
| PPIE                      | Peptidyl-prolyl cis-trans isomerase E                                     | 0.10 |
| TGF-b2                    | Transforming growth factor beta-2                                         | 0.10 |
| CHKB                      | Choline/ethanolamine kinase                                               | 0.10 |
| CXCL16, soluble           | C-X-C motif chemokine 16                                                  | 0.10 |
| SREC-II                   | Scavenger receptor class F member 2                                       | 0.10 |
| HSP 90b                   | Heat shock protein HSP 90-beta                                            | 0.10 |
| SHP-2                     | Tyrosine-protein phosphatase non-receptor type 11                         | 0.10 |
| MP2K3                     | Dual specificity mitogen-activated protein kinase 3                       | 0.10 |
| CAMK2D                    | Calcium/calmodulin-dependent protein kinase type II subunit delta         | 0.10 |
| QORL1                     | Quinone oxidoreductase-like protein 1                                     | 0.10 |
| BSSP4                     | Brain-specific serine protease 4                                          | 0.10 |
| Thrombospondin-1          | Thrombospondin-1                                                          | 0.10 |
| 41                        | Protein 4.1                                                               | 0.10 |
| MK12                      | Mitogen-activated protein kinase 12                                       | 0.10 |
| vWF                       | von Willebrand factor                                                     | 0.10 |
| ENPP7                     | Ectonucleotide pyrophosphatase/phosphodiesterase family member 7          | 0.10 |
| HCE003300                 | HCE003300                                                                 | 0.10 |
| Angiopoietin-1            | Angiopoietin-1                                                            | 0.10 |
| FLRT2                     | Leucine-rich repeat transmembrane protein FLRT2                           | 0.10 |
| EMR2                      | Adhesion G protein-coupled receptor E2                                    | 0.10 |
| Phosphoglycerate mutase 1 | Phosphoglycerate mutase 1                                                 | 0.10 |
| TrkA                      | High affinity nerve growth factor receptor                                | 0.10 |
| GX                        | Group 10 secretory phospholipase A2                                       | 0.10 |
| MMP-17                    | Matrix metalloproteinase-17                                               | 0.10 |
| CYTF                      | Cystatin-F                                                                | 0.10 |
| KI3S1                     | Killer cell immunoglobulin-like receptor 3DS1                             | 0.10 |
| Properdin                 | Properdin                                                                 | 0.10 |
| ATS13                     | A disintegrin and metalloproteinase with thrombospondin motifs 13         | 0.10 |
| HCK                       | Tyrosine-protein kinase HCK                                               | 0.10 |
| PKB a/b/g                 | RAC-alpha/beta/gamma serine/threonine-protein kinase                      | 0.10 |
| PDE1A                     | Calcium/calmodulin-dependent 3',5'-cyclic nucleotide phosphodiesterase 1A | 0.10 |
| sTie-2                    | Angiopoietin-1 receptor, soluble                                          | 0.10 |
| carbonic anhydrase II     | Carbonic anhydrase 2                                                      | 0.10 |
| p53                       | Cellular tumor antigen p53                                                | 0.10 |
| ENTP5                     | Ectonucleoside triphosphate diphosphohydrolase 5                          | 0.10 |
| ILT-2                     | Leukocyte immunoglobulin-like receptor subfamily B member 1               | 0.10 |
| Kininogen, HMW            | Kininogen-1                                                               | 0.10 |
| TSG-6                     | Tumor necrosis factor-inducible gene 6 protein                            | 0.10 |
| Protease nexin I          | Glia-derived nexin                                                        | 0.10 |
| IgM                       | Immunoglobulin M                                                          | 0.10 |

|                         |                                                        |      |
|-------------------------|--------------------------------------------------------|------|
| ANGL4                   | Angiopoietin-related protein 4                         | 0.10 |
| FGFR4                   | Fibroblast growth factor receptor 4                    | 0.09 |
| NAP-2                   | Neutrophil-activating peptide 2                        | 0.09 |
| IL-1a                   | Interleukin-1 alpha                                    | 0.09 |
| Lymphotactin            | Lymphotactin                                           | 0.09 |
| IL-4 sR                 | Interleukin-4 receptor subunit alpha                   | 0.09 |
| COLEC12                 | Collectin-12                                           | 0.09 |
| SNP25                   | Synaptosomal-associated protein 25                     | 0.09 |
| IL-1 sRI                | Interleukin-1 receptor type 1                          | 0.09 |
| IL-17 RD                | Interleukin-17 receptor D                              | 0.09 |
| MO2R1                   | Cell surface glycoprotein CD200 receptor 1             | 0.09 |
| MIC-1                   | Growth/differentiation factor 15                       | 0.09 |
| CO8A1                   | Collagen alpha-1(VIII) chain                           | 0.09 |
| NKG2D                   | NKG2-D type II integral membrane protein               | 0.09 |
| C6                      | Complement component C6                                | 0.09 |
| MUC1                    | Mucin-1                                                | 0.09 |
| DKK1                    | Dickkopf-related protein 1                             | 0.09 |
| NRX1B                   | Neurexin-1-beta                                        | 0.09 |
| RGM-C                   | Hemojuvelin                                            | 0.09 |
| Nectin-like protein 2   | Cell adhesion molecule 1                               | 0.09 |
| Growth hormone receptor | Growth hormone receptor                                | 0.09 |
| DRR1                    | Protein FAM107A                                        | 0.09 |
| TrkC                    | NT-3 growth factor receptor                            | 0.09 |
| MCP-4                   | C-C motif chemokine 13                                 | 0.09 |
| IL-22                   | Interleukin-22                                         | 0.09 |
| EFNB1                   | Ephrin-B1                                              | 0.09 |
| EphA1                   | Ephrin type-A receptor 1                               | 0.09 |
| CRTAM                   | Cytotoxic and regulatory T-cell molecule               | 0.09 |
| Insulin                 | Insulin                                                | 0.09 |
| SHC1                    | SHC-transforming protein 1                             | 0.09 |
| SHBG                    | Sex hormone-binding globulin                           | 0.09 |
| RUXF                    | Small nuclear ribonucleoprotein F                      | 0.09 |
| Myoglobin               | Myoglobin                                              | 0.09 |
| RAC1                    | Ras-related C3 botulinum toxin substrate 1             | 0.09 |
| ANGL3                   | Angiopoietin-related protein 3                         | 0.09 |
| GIB                     | Phospholipase A2                                       | 0.08 |
| G-CSF                   | Granulocyte colony-stimulating factor                  | 0.08 |
| CD47                    | Leukocyte surface antigen CD47                         | 0.08 |
| BTC                     | Betacellulin                                           | 0.08 |
| Sonic Hedgehog          | Sonic hedgehog protein                                 | 0.08 |
| SCGF-alpha              | Stem cell growth factor-alpha                          | 0.08 |
| SIG14                   | Sialic acid-binding Ig-like lectin 14                  | 0.08 |
| FGR                     | Tyrosine-protein kinase Fgr                            | 0.08 |
| ERP29                   | Endoplasmic reticulum resident protein 29              | 0.08 |
| EphB4                   | Ephrin type-B receptor 4                               | 0.08 |
| EFNB2                   | Ephrin-B2                                              | 0.08 |
| Angiopoietin-2          | Angiopoietin-2                                         | 0.08 |
| C1r                     | Complement C1r subcomponent                            | 0.08 |
| EDAR                    | Tumor necrosis factor receptor superfamily member EDAR | 0.08 |
| TCPTP                   | Tyrosine-protein phosphatase non-receptor type 2       | 0.08 |
| CRK                     | Adapter molecule crk                                   | 0.08 |
| RAP                     | alpha-2-macroglobulin receptor-associated protein      | 0.08 |
| HCE003167               | HCE003167                                              | 0.08 |



|                            |                                                                        |      |
|----------------------------|------------------------------------------------------------------------|------|
| PHI                        | Glucose-6-phosphate isomerase                                          | 0.08 |
| ENA-78                     | C-X-C motif chemokine 5                                                | 0.08 |
| MMP-14                     | Matrix metalloproteinase-14                                            | 0.08 |
| BGH3                       | Transforming growth factor-beta-induced protein ig-h3                  | 0.08 |
| Cystatin-S                 | Cystatin-S                                                             | 0.08 |
| RGMB                       | RGM domain family member B                                             | 0.08 |
| AMPM2                      | Methionine aminopeptidase 2                                            | 0.08 |
| Glutamate carboxypeptidase | Cytosolic non-specific dipeptidase                                     | 0.08 |
| PSMA                       | Glutamate carboxypeptidase 2                                           | 0.08 |
| LIF sR                     | Leukemia inhibitory factor receptor                                    | 0.08 |
| b-ECGF                     | Fibroblast growth factor 1                                             | 0.08 |
| MICB                       | MHC class I polypeptide-related sequence B                             | 0.08 |
| IL-1Ra                     | Interleukin-1 receptor antagonist protein                              | 0.08 |
| P-Cadherin                 | Cadherin-3                                                             | 0.08 |
| suPAR                      | Urokinase plasminogen activator surface receptor                       | 0.08 |
| Apo E2                     | Apolipoprotein E (isoform E2)                                          | 0.08 |
| BMX                        | Cytoplasmic tyrosine-protein kinase BMX                                | 0.07 |
| MATN3                      | Matrilin-3                                                             | 0.07 |
| CNDP1                      | Beta-Ala-His dipeptidase                                               | 0.07 |
| SGTA                       | Small glutamine-rich tetratricopeptide repeat-containing protein alpha | 0.07 |
| SCGF-beta                  | Stem Cell Growth Factor-beta                                           | 0.07 |
| CTAP-III                   | Connective tissue-activating peptide III                               | 0.07 |
| PTK6                       | Protein-tyrosine kinase 6                                              | 0.07 |
| Apo E4                     | Apolipoprotein E (isoform E4)                                          | 0.07 |
| NET4                       | Netrin-4                                                               | 0.07 |
| NCAM-120                   | Neural cell adhesion molecule 1, 120 kDa isoform                       | 0.07 |
| FSTL1                      | Follistatin-related protein 1                                          | 0.07 |
| IFN-g R1                   | Interferon gamma receptor 1                                            | 0.07 |
| SEM5A                      | Semaphorin-5A                                                          | 0.07 |
| NCC27                      | Chloride intracellular channel protein 1                               | 0.07 |
| HCE000104                  | HCE000104                                                              | 0.07 |
| kallikrein 13              | Kallikrein-13                                                          | 0.07 |
| Dtk                        | Tyrosine-protein kinase receptor TYRO3                                 | 0.07 |
| SBDS                       | Ribosome maturation protein SBDS                                       | 0.07 |
| LAG-1                      | C-C motif chemokine 4-like                                             | 0.07 |
| Caspase-10                 | Caspase-10                                                             | 0.07 |
| HCC-1                      | C-C motif chemokine 14                                                 | 0.07 |
| Neurotrophin-3             | Neurotrophin-3                                                         | 0.07 |
| Fractalkine/CX3CL-1        | Fractalkine                                                            | 0.07 |
| LDLR                       | Low-density lipoprotein receptor                                       | 0.07 |
| FCN1                       | Ficolin-1                                                              | 0.07 |
| SLIK5                      | SLIT and NTRK-like protein 5                                           | 0.07 |
| HRG                        | Histidine-rich glycoprotein                                            | 0.07 |
| HCE004359                  | HCE004359                                                              | 0.07 |
| S100A7                     | Protein S100-A7                                                        | 0.07 |
| FTCD                       | Formimidoyltransferase-cyclodeaminase                                  | 0.07 |
| GNS                        | N-acetylglucosamine-6-sulfatase                                        | 0.07 |
| DERM                       | Dermatopontin                                                          | 0.07 |
| 6Ckine                     | C-C motif chemokine 21                                                 | 0.07 |
| ERBB4                      | Receptor tyrosine-protein kinase erbB-4                                | 0.07 |
| Cardiotrophin-1            | Cardiotrophin-1                                                        | 0.07 |
| Fas, soluble               | Tumor necrosis factor receptor superfamily member 6                    | 0.07 |
| Ephrin-A2                  | Ephrin-A2                                                              | 0.07 |

|                            |                                                                     |      |
|----------------------------|---------------------------------------------------------------------|------|
| TAJ                        | Tumor necrosis factor receptor superfamily member 19                | 0.07 |
| CD63                       | CD63 antigen                                                        | 0.07 |
| CREL1                      | Cysteine-rich with EGF-like domain protein 1                        | 0.07 |
| XEDAR                      | Tumor necrosis factor receptor superfamily member 27                | 0.07 |
| amyloid precursor protein  | Amyloid beta A4 protein                                             | 0.07 |
| Tenascin                   | Tenascin                                                            | 0.07 |
| ASAH1                      | N-acylethanolamine-hydrolyzing acid amidase                         | 0.06 |
| DC-SIGN                    | CD209 antigen                                                       | 0.06 |
| IL-20                      | Interleukin-20                                                      | 0.06 |
| URB                        | Coiled-coil domain-containing protein 80                            | 0.06 |
| CK2-A2:B                   | Casein kinase II 2-alpha':2-beta heterotetramer                     | 0.06 |
| TIMD3                      | Hepatitis A virus cellular receptor 2                               | 0.06 |
| RAC3                       | Ras-related C3 botulinum toxin substrate 3                          | 0.06 |
| Thyroglobulin              | Thyroglobulin                                                       | 0.06 |
| Myostatin                  | Growth/differentiation factor 8                                     | 0.06 |
| TIMP-3                     | Metalloproteinase inhibitor 3                                       | 0.06 |
| Testican-1                 | Testican-1                                                          | 0.06 |
| FGF-5                      | Fibroblast growth factor 5                                          | 0.06 |
| GDF-11/8                   | Growth/differentiation factor 11/8                                  | 0.06 |
| Notch 1                    | Neurogenic locus notch homolog protein 1                            | 0.06 |
| Cyclophilin F              | Peptidyl-prolyl cis-trans isomerase F, mitochondrial                | 0.06 |
| EGF                        | Epidermal growth factor                                             | 0.06 |
| STRATIFIN                  | 14-3-3 protein sigma                                                | 0.06 |
| ISLR2                      | Immunoglobulin superfamily containing leucine-rich repeat protein 2 | 0.06 |
| IL-1 R4                    | Interleukin-1 receptor-like 1                                       | 0.06 |
| Thyroxine-Binding Globulin | Thyroxine-binding globulin                                          | 0.06 |
| CD70                       | CD70 antigen                                                        | 0.06 |
| MIP-3a                     | C-C motif chemokine 20                                              | 0.06 |
| BMP RII                    | Bone morphogenetic protein receptor type-2                          | 0.06 |
| IL-2 sRa                   | Interleukin-2 receptor subunit alpha                                | 0.06 |
| TBP                        | TATA-box-binding protein                                            | 0.06 |
| C9                         | Complement component C9                                             | 0.06 |
| PPAC                       | Low molecular weight phosphotyrosine protein phosphatase            | 0.06 |
| PKB beta                   | RAC-beta serine/threonine-protein kinase                            | 0.06 |
| TXD12                      | Thioredoxin domain-containing protein 12                            | 0.06 |
| DUS3                       | Dual specificity protein phosphatase 3                              | 0.06 |
| Carbonic anhydrase III     | Carbonic anhydrase 3                                                | 0.06 |
| GFRa-3                     | GDNF family receptor alpha-3                                        | 0.06 |
| DLL4                       | Delta-like protein 4                                                | 0.06 |
| Persephin                  | Persephin                                                           | 0.06 |
| FN1.4                      | Fibronectin Fragment 4                                              | 0.06 |
| Cadherin E                 | Cadherin-1                                                          | 0.06 |
| sRAGE                      | Advanced glycosylation end product-specific receptor, soluble       | 0.06 |
| XPNPEP1                    | Xaa-Pro aminopeptidase 1                                            | 0.06 |
| AMPK a2b2g1                | AMP Kinase (alpha2beta2gamma1)                                      | 0.06 |
| METAP1                     | Methionine aminopeptidase 1                                         | 0.06 |
| CK2-A1:B                   | Casein kinase II 2-alpha:2-beta heterotetramer                      | 0.06 |
| TAFI                       | Carboxypeptidase B2                                                 | 0.06 |
| SMAD2                      | Mothers against decapentaplegic homolog 2                           | 0.06 |
| IDUA                       | Alpha-L-iduronidase                                                 | 0.06 |
| 14-3-3                     | 14-3-3 protein family                                               | 0.06 |
| VEGF sR2                   | Vascular endothelial growth factor receptor 2                       | 0.06 |
| Ferritin                   | Ferritin                                                            | 0.06 |

|                                |                                                                        |      |
|--------------------------------|------------------------------------------------------------------------|------|
| Aggrecan                       | Aggrecan core protein                                                  | 0.06 |
| Activin AB                     | Inhibin beta A chain:Inhibin beta B chain heterodimer                  | 0.06 |
| CLC4K                          | C-type lectin domain family 4 member K                                 | 0.06 |
| BPI                            | Bactericidal permeability-increasing protein                           | 0.05 |
| C5a                            | C5a anaphylatoxin                                                      | 0.05 |
| Siglec-6                       | Sialic acid-binding Ig-like lectin 6                                   | 0.05 |
| Livin B                        | Baculoviral IAP repeat-containing protein 7 Isoform beta               | 0.05 |
| GCP-2                          | C-X-C motif chemokine 6                                                | 0.05 |
| Cathepsin V                    | Cathepsin L2                                                           | 0.05 |
| Endothelin-converting enzyme 1 | Endothelin-converting enzyme 1                                         | 0.05 |
| BAFF Receptor                  | Tumor necrosis factor receptor superfamily member 13C                  | 0.05 |
| GAS1                           | Growth arrest-specific protein 1                                       | 0.05 |
| KIRR3                          | Kin of IRRE-like protein 3                                             | 0.05 |
| IL-17B R                       | Interleukin-17 receptor B                                              | 0.05 |
| PEX5                           | Peroxisomal targeting signal 1 receptor                                | 0.05 |
| RSPO4                          | R-spondin-4                                                            | 0.05 |
| CLM6                           | CMRF35-like molecule 6                                                 | 0.05 |
| FN1.3                          | Fibronectin Fragment 3                                                 | 0.05 |
| WFKN1                          | WAP, kazal, immunoglobulin, kunitz and NTR domain-containing protein 1 | 0.05 |
| Gelsolin                       | Gelsolin                                                               | 0.05 |
| MASP3                          | Mannan-binding lectin serine protease 1                                | 0.05 |
| Endocan                        | Endothelial cell-specific molecule 1                                   | 0.05 |
| ANP                            | Atrial natriuretic factor                                              | 0.05 |
| PDGF-BB                        | Platelet-derived growth factor subunit B                               | 0.05 |
| ASM3A                          | Acid sphingomyelinase-like phosphodiesterase 3a                        | 0.05 |
| protein Z inhibitor            | Protein Z-dependent protease inhibitor                                 | 0.05 |
| discoidin domain receptor 1    | Epithelial discoidin domain-containing receptor 1                      | 0.05 |
| FCG2A                          | Low affinity immunoglobulin gamma Fc region receptor II-a              | 0.05 |
| CATZ                           | Cathepsin Z                                                            | 0.05 |
| Sorting nexin 4                | Sorting nexin-4                                                        | 0.05 |
| PGM1                           | Phosphoglucomutase-1                                                   | 0.05 |
| Plasminogen                    | Plasminogen                                                            | 0.05 |
| MMP-2                          | 72 kDa type IV collagenase                                             | 0.05 |
| C4                             | Complement C4                                                          | 0.05 |
| Kallikrein 11                  | Kallikrein-11                                                          | 0.05 |
| IL-1 R AcP                     | Interleukin-1 Receptor accessory protein                               | 0.05 |
| HVEM                           | Tumor necrosis factor receptor superfamily member 14                   | 0.05 |
| RASA1                          | Ras GTPase-activating protein 1                                        | 0.05 |
| RGMA                           | Repulsive guidance molecule A                                          | 0.05 |
| LKHA4                          | Leukotriene A-4 hydrolase                                              | 0.05 |
| MOZ                            | Histone acetyltransferase KAT6A                                        | 0.05 |
| IFN-b                          | Interferon beta                                                        | 0.05 |
| MATN2                          | Matrilin-2                                                             | 0.05 |
| a1-Antitrypsin                 | Alpha-1-antitrypsin                                                    | 0.05 |
| CKAP2                          | Cytoskeleton-associated protein 2                                      | 0.05 |
| CAPG                           | Macrophage-capping protein                                             | 0.05 |
| GDNF                           | Glial cell line-derived neurotrophic factor                            | 0.05 |
| LEAP-1                         | Hepcidin                                                               | 0.05 |
| cIAP-2                         | Baculoviral IAP repeat-containing protein 3                            | 0.05 |
| Coagulation Factor IXab        | Coagulation factor IXab                                                | 0.05 |
| PAK3                           | Serine/threonine-protein kinase PAK 3                                  | 0.05 |
| Eotaxin-2                      | C-C motif chemokine 24                                                 | 0.05 |
| IL-18 Ra                       | Interleukin-18 receptor 1                                              | 0.04 |

|                             |                                                                |      |
|-----------------------------|----------------------------------------------------------------|------|
| PDPK1                       | 3-phosphoinositide-dependent protein kinase 1                  | 0.04 |
| TPSB2                       | Tryptase beta-2                                                | 0.04 |
| BST1                        | ADP-ribosyl cyclase/cyclic ADP-ribose hydrolase 2              | 0.04 |
| PF-4                        | Platelet factor 4                                              | 0.04 |
| Apo B                       | Apolipoprotein B                                               | 0.04 |
| SOD3                        | Extracellular superoxide dismutase [Cu-Zn]                     | 0.04 |
| B7                          | T-lymphocyte activation antigen CD80                           | 0.04 |
| Periostin                   | Periostin                                                      | 0.04 |
| ASGR1                       | Asialoglycoprotein receptor 1                                  | 0.04 |
| IL-1b                       | Interleukin-1 beta                                             | 0.04 |
| GRB2 adapter protein        | Growth factor receptor-bound protein 2                         | 0.04 |
| IL-5                        | Interleukin-5                                                  | 0.04 |
| C4b                         | Complement C4b                                                 | 0.04 |
| TLR4                        | Toll-like receptor 4                                           | 0.04 |
| Prekallikrein               | Plasma kallikrein                                              | 0.04 |
| Discoidin domain receptor 2 | Discoidin domain-containing receptor 2                         | 0.04 |
| CBPE                        | Carboxypeptidase E                                             | 0.04 |
| annexin VI                  | Annexin A6                                                     | 0.04 |
| BAFF                        | Tumor necrosis factor ligand superfamily member 13B            | 0.04 |
| Cathepsin H                 | Cathepsin H                                                    | 0.04 |
| CBX5                        | Chromobox protein homolog 5                                    | 0.04 |
| Hemopexin                   | Hemopexin                                                      | 0.04 |
| Apo D                       | Apolipoprotein D                                               | 0.04 |
| IGFBP-1                     | Insulin-like growth factor-binding protein 1                   | 0.04 |
| IL-1 sRII                   | Interleukin-1 receptor type 2                                  | 0.04 |
| IL-5 Ra                     | Interleukin-5 receptor subunit alpha                           | 0.04 |
| GDF2                        | Growth/differentiation factor 2                                | 0.04 |
| CAMK1                       | Calcium/calmodulin-dependent protein kinase type 1             | 0.04 |
| BMP-6                       | Bone morphogenetic protein 6                                   | 0.04 |
| Galectin-8                  | Galectin-8                                                     | 0.04 |
| MEK1                        | Dual specificity mitogen-activated protein kinase 1            | 0.04 |
| FGF-10                      | Fibroblast growth factor 10                                    | 0.04 |
| Fibrinogen                  | Fibrinogen                                                     | 0.04 |
| RS7                         | 40S ribosomal protein S7                                       | 0.04 |
| CHST6                       | Carbohydrate sulfotransferase 6                                | 0.04 |
| MSP                         | Hepatocyte growth factor-like protein                          | 0.04 |
| IL22RA1                     | Interleukin-22 receptor subunit alpha-1                        | 0.04 |
| IFN-g                       | Interferon gamma                                               | 0.04 |
| NEGR1                       | Neuronal growth regulator 1                                    | 0.04 |
| BMP-1                       | Bone morphogenetic protein 1                                   | 0.04 |
| LRIG3                       | Leucine-rich repeats and immunoglobulin-like domains protein 3 | 0.04 |
| ST4S6                       | Carbohydrate sulfotransferase 15                               | 0.04 |
| WISP-3                      | WNT1-inducible-signaling pathway protein 3                     | 0.04 |
| PCNA                        | Proliferating cell nuclear antigen                             | 0.04 |
| ART                         | Agouti-related protein                                         | 0.04 |
| EG-VEGF                     | Prokineticin-1                                                 | 0.04 |
| sL-Selectin                 | L-Selectin                                                     | 0.04 |
| IgE                         | Immunoglobulin E                                               | 0.04 |
| Aurora kinase A             | Aurora kinase A                                                | 0.04 |
| HGF                         | Hepatocyte growth factor                                       | 0.04 |
| OSM                         | Oncostatin-M                                                   | 0.04 |
| Ku70                        | X-ray repair cross-complementing protein 6                     | 0.03 |
| Tropomyosin 2               | Tropomyosin beta chain                                         | 0.03 |

|                                   |                                                            |      |
|-----------------------------------|------------------------------------------------------------|------|
| HNRPQ                             | Heterogeneous nuclear ribonucleoprotein Q                  | 0.03 |
| PGP9.5                            | Ubiquitin carboxyl-terminal hydrolase isozyme L1           | 0.03 |
| Apo L1                            | Apolipoprotein L1                                          | 0.03 |
| Arylsulfatase A                   | Arylsulfatase A                                            | 0.03 |
| UFM1                              | Ubiquitin-fold modifier 1                                  | 0.03 |
| TGF-b1                            | Transforming growth factor beta-1                          | 0.03 |
| aldolase A                        | Fructose-bisphosphate aldolase A                           | 0.03 |
| PSP                               | Lithostathine-1-alpha                                      | 0.03 |
| OPG                               | Tumor necrosis factor receptor superfamily member 11B      | 0.03 |
| FABPL                             | Fatty acid-binding protein, liver                          | 0.03 |
| Epo                               | Erythropoietin                                             | 0.03 |
| DKK3                              | Dickkopf-related protein 3                                 | 0.03 |
| SMAC                              | Diablo homolog, mitochondrial                              | 0.03 |
| HAI-1                             | Kunitz-type protease inhibitor 1                           | 0.03 |
| FCG3B                             | Low affinity immunoglobulin gamma Fc region receptor III-B | 0.03 |
| Troponin I, skeletal, fast twitch | Troponin I, fast skeletal muscle                           | 0.03 |
| PolyUbiquitin K63                 | PolyUbiquitin K63-linked                                   | 0.03 |
| NID2                              | Nidogen-2                                                  | 0.03 |
| B7-2                              | T-lymphocyte activation antigen CD86                       | 0.03 |
| EGFRvIII                          | Epidermal growth factor receptor variant III               | 0.03 |
| CRIS3                             | Cysteine-rich secretory protein 3                          | 0.03 |
| Prolactin Receptor                | Prolactin receptor                                         | 0.03 |
| Trefoil factor 2                  | Trefoil factor 2                                           | 0.03 |
| CD39                              | Ectonucleoside triphosphate diphosphohydrolase 1           | 0.03 |
| annexin II                        | Annexin A2                                                 | 0.03 |
| Annexin V                         | Annexin A5                                                 | 0.03 |
| calgranulin B                     | Protein S100-A9                                            | 0.03 |
| Ficolin-3                         | Ficolin-3                                                  | 0.03 |
| NSE                               | Gamma-enolase                                              | 0.03 |
| FGF-18                            | Fibroblast growth factor 18                                | 0.03 |
| SPARCL1                           | SPARC-like protein 1                                       | 0.03 |
| PCSK7                             | Proprotein convertase subtilisin/kexin type 7              | 0.03 |
| IP-10                             | C-X-C motif chemokine 10                                   | 0.03 |
| Epithelial cell kinase            | Ephrin type-A receptor 2                                   | 0.03 |
| JAK2                              | Tyrosine-protein kinase JAK2                               | 0.03 |
| PSA1                              | Proteasome subunit alpha type-1                            | 0.03 |
| NMT1                              | Glycylpeptide N-tetradecanoyltransferase 1                 | 0.03 |
| Notch-3                           | Neurogenic locus notch homolog protein 3                   | 0.03 |
| TLR2                              | Toll-like receptor 2                                       | 0.03 |
| Lymphotoxin a2/b1                 | Lymphotoxin alpha2:beta1                                   | 0.03 |
| TrkB                              | BDNF/NT-3 growth factors receptor                          | 0.03 |
| KPCT                              | Protein kinase C theta type                                | 0.03 |
| SCF sR                            | Mast/stem cell growth factor receptor Kit                  | 0.03 |
| CSF-1                             | Macrophage colony-stimulating factor 1                     | 0.03 |
| TNFSF18                           | Tumor necrosis factor ligand superfamily member 18         | 0.03 |
| CDK8/cyclin C                     | Cyclin-dependent kinase 8:Cyclin-C complex                 | 0.03 |
| SLAF6                             | SLAM family member 6                                       | 0.03 |
| JAG2                              | Protein jagged-2                                           | 0.03 |
| Mn SOD                            | Superoxide dismutase [Mn], mitochondrial                   | 0.03 |
| FGF-8A                            | Fibroblast growth factor 8 isoform A                       | 0.03 |
| HPV E7 Type18                     | Protein E7_HP18                                            | 0.03 |
| LCMT1                             | Leucine carboxyl methyltransferase 1                       | 0.03 |
| Bone proteoglycan II              | Decorin                                                    | 0.03 |

|                          |                                                            |      |
|--------------------------|------------------------------------------------------------|------|
| ALT                      | Alanine aminotransferase 1                                 | 0.03 |
| Glucagon                 | Glucagon                                                   | 0.03 |
| I-TAC                    | C-X-C motif chemokine 11                                   | 0.03 |
| HTRA2                    | Serine protease HTRA2, mitochondrial                       | 0.03 |
| PYY                      | Peptide YY                                                 | 0.03 |
| GPNMB                    | Transmembrane glycoprotein NMB                             | 0.03 |
| STAB2                    | Stabilin-2                                                 | 0.03 |
| Peroxiredoxin-5          | Peroxiredoxin-5, mitochondrial                             | 0.03 |
| H2B2E                    | Histone H2B type 2-E                                       | 0.03 |
| IGF-I sR                 | Insulin-like growth factor 1 receptor                      | 0.03 |
| Coactosin-like protein   | Coactosin-like protein                                     | 0.03 |
| Kallikrein 6             | Kallikrein-6                                               | 0.03 |
| MFGM                     | Lactadherin                                                | 0.03 |
| Tpo                      | Thrombopoietin                                             | 0.03 |
| IL-17 sR                 | Interleukin-17 receptor A                                  | 0.03 |
| SHPS1                    | Tyrosine-protein phosphatase non-receptor type substrate 1 | 0.03 |
| TF                       | Tissue Factor                                              | 0.03 |
| NRX3B                    | Neurexin-3-beta                                            | 0.03 |
| TIMP-2                   | Metalloproteinase inhibitor 2                              | 0.02 |
| BLC                      | C-X-C motif chemokine 13                                   | 0.02 |
| Corticotropin-lipotropin | Pro-opiomelanocortin                                       | 0.02 |
| OCAD1                    | OCIA domain-containing protein 1                           | 0.02 |
| FGF7                     | Fibroblast growth factor 7                                 | 0.02 |
| Chitotriosidase-1        | Chitotriosidase-1                                          | 0.02 |
| OX40 Ligand              | Tumor necrosis factor ligand superfamily member 4          | 0.02 |
| FCAR                     | Immunoglobulin alpha Fc receptor                           | 0.02 |
| Factor H                 | Complement factor H                                        | 0.02 |
| IL-7 Ra                  | Interleukin-7 receptor subunit alpha                       | 0.02 |
| FUT5                     | Alpha-(1,3)-fucosyltransferase 5                           | 0.02 |
| PESC                     | Pescadillo homolog                                         | 0.02 |
| TIMP-1                   | Metalloproteinase inhibitor 1                              | 0.02 |
| SDF-1                    | Stromal cell-derived factor 1                              | 0.02 |
| PSME3                    | Proteasome activator complex subunit 3                     | 0.02 |
| ASAH2                    | Neutral ceramidase                                         | 0.02 |
| Testican-2               | Testican-2                                                 | 0.02 |
| UB2G2                    | Ubiquitin-conjugating enzyme E2 G2                         | 0.02 |
| Cathepsin D              | Cathepsin D                                                | 0.02 |
| Coagulation Factor V     | Coagulation Factor V                                       | 0.02 |
| Olfactomedin-4           | Olfactomedin-4                                             | 0.02 |
| C8                       | Complement component C8                                    | 0.02 |
| ZNRF3                    | E3 ubiquitin-protein ligase ZNRF3                          | 0.02 |
| COX-2                    | Prostaglandin G/H synthase 2                               | 0.02 |
| Transgelin-2             | Transgelin-2                                               | 0.02 |
| MMP-10                   | Stromelysin-2                                              | 0.02 |
| IF4G2                    | Eukaryotic translation initiation factor 4 gamma 2         | 0.02 |
| LRP1B                    | Low-density lipoprotein receptor-related protein 1B        | 0.02 |
| Fibronectin              | Fibronectin                                                | 0.02 |
| hnRNP K                  | Heterogeneous nuclear ribonucleoprotein K                  | 0.02 |
| CDON                     | Cell adhesion molecule-related/down-regulated by oncogenes | 0.02 |
| Carbonic anhydrase XIII  | Carbonic anhydrase 13                                      | 0.02 |
| GRN                      | Granulins                                                  | 0.02 |
| Gro-b/g                  | Gro-beta/gamma                                             | 0.02 |
| Galectin-3               | Galectin-3                                                 | 0.02 |

|                           |                                                                        |      |
|---------------------------|------------------------------------------------------------------------|------|
| KLRF1                     | Killer cell lectin-like receptor subfamily F member 1                  | 0.02 |
| 14-3-3E                   | 14-3-3 protein epsilon                                                 | 0.02 |
| Trypsin                   | Trypsin-1                                                              | 0.02 |
| Cadherin-2                | Cadherin-2                                                             | 0.02 |
| contactin-1               | Contactin-1                                                            | 0.02 |
| CD23                      | Low affinity immunoglobulin epsilon Fc receptor                        | 0.02 |
| WFKN2                     | WAP, Kazal, immunoglobulin, Kunitz and NTR domain-containing protein 2 | 0.02 |
| GIIE                      | Group IIE secretory phospholipase A2                                   | 0.02 |
| FSH                       | Follicle stimulating hormone                                           | 0.02 |
| Hat1                      | Histone acetyltransferase type B catalytic subunit                     | 0.02 |
| IL-17F                    | Interleukin-17F                                                        | 0.02 |
| Glypican 3                | Glypican-3                                                             | 0.02 |
| SMOC1                     | SPARC-related modular calcium-binding protein 1                        | 0.02 |
| RAD51                     | DNA repair protein RAD51 homolog 1                                     | 0.02 |
| Caspase-3                 | Caspase-3                                                              | 0.02 |
| FGF-19                    | Fibroblast growth factor 19                                            | 0.02 |
| Coagulation Factor IX     | Coagulation factor IX                                                  | 0.02 |
| OAS1                      | 2'-5'-oligoadenylate synthase 1                                        | 0.02 |
| Integrin aVb5             | Integrin alpha-V: beta-5 complex                                       | 0.02 |
| ERBB3                     | Receptor tyrosine-protein kinase erbB-3                                | 0.02 |
| NRG4                      | Neuregulin-4                                                           | 0.02 |
| DSCAM                     | Down syndrome cell adhesion molecule                                   | 0.02 |
| PCSK9                     | Proprotein convertase subtilisin/kexin type 9                          | 0.02 |
| XTP3A                     | dCTP pyrophosphatase 1                                                 | 0.02 |
| H2A3                      | Histone H2A type 3                                                     | 0.02 |
| Mesothelin                | Mesothelin                                                             | 0.02 |
| TRAIL R1                  | Tumor necrosis factor receptor superfamily member 10A                  | 0.02 |
| REG4                      | Regenerating islet-derived protein 4                                   | 0.02 |
| IL-17 RC                  | Interleukin-17 receptor C                                              | 0.02 |
| IL-10                     | Interleukin-10                                                         | 0.02 |
| Apoptosis regulator Bcl-W | Bcl-2-like protein 2                                                   | 0.02 |
| ITI heavy chain H4        | Inter-alpha-trypsin inhibitor heavy chain H4                           | 0.02 |
| tPA                       | Tissue-type plasminogen activator                                      | 0.02 |
| MK13                      | Mitogen-activated protein kinase 13                                    | 0.02 |
| GDF-11                    | Growth/differentiation factor 11                                       | 0.02 |
| Lipocalin 2               | Neutrophil gelatinase-associated lipocalin                             | 0.02 |
| IgG                       | Immunoglobulin G                                                       | 0.02 |
| GP1BA                     | Platelet glycoprotein Ib alpha chain                                   | 0.02 |
| Endostatin                | Endostatin                                                             | 0.02 |
| PAI-1                     | Plasminogen activator inhibitor 1                                      | 0.02 |
| HCE000483                 | HCE000483                                                              | 0.02 |
| Gro-a                     | Growth-regulated alpha protein                                         | 0.02 |
| IL-1 sR9                  | X-linked interleukin-1 receptor accessory protein-like 2               | 0.02 |
| 14-3-3 protein zeta/delta | 14-3-3 protein zeta/delta                                              | 0.02 |
| MAPK2                     | MAP kinase-activated protein kinase 2                                  | 0.02 |
| PDE9A                     | High affinity cGMP-specific 3',5'-cyclic phosphodiesterase 9A          | 0.02 |
| UNC5H3                    | Netrin receptor UNC5C                                                  | 0.02 |
| Nidogen                   | Nidogen-1                                                              | 0.02 |
| STK16                     | Serine/threonine-protein kinase 16                                     | 0.02 |
| ECM1                      | Extracellular matrix protein 1                                         | 0.02 |
| MK11                      | Mitogen-activated protein kinase 11                                    | 0.02 |
| EMAP-2                    | Endothelial monocyte-activating polypeptide 2                          | 0.02 |
| M-CSF R                   | Macrophage colony-stimulating factor 1 receptor                        | 0.02 |

|                           |                                                                 |      |
|---------------------------|-----------------------------------------------------------------|------|
| PLK-1                     | Serine/threonine-protein kinase PLK1                            | 0.02 |
| CLC1B                     | C-type lectin domain family 1 member B                          | 0.02 |
| Fas ligand, soluble       | Tumor necrosis factor ligand superfamily member 6, soluble form | 0.02 |
| Activin RIB               | Activin receptor type-1B                                        | 0.02 |
| RBM39                     | RNA-binding protein 39                                          | 0.02 |
| Myeloperoxidase           | Myeloperoxidase                                                 | 0.02 |
| LYN                       | Tyrosine-protein kinase Lyn                                     | 0.02 |
| Keratin 18                | Keratin, type I cytoskeletal 18                                 | 0.02 |
| SAP                       | Serum amyloid P-component                                       | 0.02 |
| CD36 ANTIGEN              | Platelet glycoprotein 4                                         | 0.02 |
| AFP                       | alpha-Fetoprotein                                               | 0.02 |
| MIF                       | Macrophage migration inhibitory factor                          | 0.02 |
| ANK2                      | Ankyrin-2                                                       | 0.02 |
| MICA                      | MHC class I polypeptide-related sequence A                      | 0.02 |
| kallikrein 8              | Kallikrein-8                                                    | 0.01 |
| LYPD3                     | Ly6/PLAUR domain-containing protein 3                           | 0.01 |
| Tropomyosin 1 alpha chain | Tropomyosin alpha-1 chain                                       | 0.01 |
| FAM107B                   | Protein FAM107B                                                 | 0.01 |
| C7                        | Complement component C7                                         | 0.01 |
| Angiostatin               | Angiostatin                                                     | 0.01 |
| PTP-1B                    | Tyrosine-protein phosphatase non-receptor type 1                | 0.01 |
| MMP-1                     | Interstitial collagenase                                        | 0.01 |
| IL-17B                    | Interleukin-17B                                                 | 0.01 |
| OX2G                      | OX-2 membrane glycoprotein                                      | 0.01 |
| sICAM-2                   | Intercellular adhesion molecule 2                               | 0.01 |
| CSK                       | Tyrosine-protein kinase CSK                                     | 0.01 |
| BCMA                      | Tumor necrosis factor receptor superfamily member 17            | 0.01 |
| CNTF                      | Ciliary neurotrophic factor                                     | 0.01 |
| C5b, 6 Complex            | Complement C5b-C6 complex                                       | 0.01 |
| MK08                      | Mitogen-activated protein kinase 8                              | 0.01 |
| GM-CSF                    | Granulocyte-macrophage colony-stimulating factor                | 0.01 |
| DSC3                      | Desmocollin-3                                                   | 0.01 |
| Integrin a1b1             | Integrin alpha-I: beta-1 complex                                | 0.01 |
| WISP-1                    | WNT1-inducible-signaling pathway protein 1                      | 0.01 |
| B7-H2                     | ICOS ligand                                                     | 0.01 |
| BCAM                      | Basal Cell Adhesion Molecule                                    | 0.01 |
| PRL                       | Prolactin                                                       | 0.01 |
| PKC-B-II                  | Protein kinase C beta type (splice variant beta-II)             | 0.01 |
| Cyclin B1                 | G2/mitotic-specific cyclin-B1                                   | 0.01 |
| IGFBP-3                   | Insulin-like growth factor-binding protein 3                    | 0.01 |
| granzyme A                | Granzyme A                                                      | 0.01 |
| FGF-20                    | Fibroblast growth factor 20                                     | 0.01 |
| CD30 Ligand               | Tumor necrosis factor ligand superfamily member 8               | 0.01 |
| Siglec-9                  | Sialic acid-binding Ig-like lectin 9                            | 0.01 |
| NDP kinase B              | Nucleoside diphosphate kinase B                                 | 0.01 |
| Semaphorin 3E             | Semaphorin-3E                                                   | 0.01 |
| Antithrombin III          | Antithrombin-III                                                | 0.01 |
| MMP-9                     | Matrix metalloproteinase-9                                      | 0.01 |
| HPV E7 Type 16            | Protein E7_HPV16                                                | 0.01 |
| CHK1                      | Serine/threonine-protein kinase Chk1                            | 0.01 |
| LAG-3                     | Lymphocyte activation gene 3 protein                            | 0.01 |
| Ephrin-B3                 | Ephrin-B3                                                       | 0.01 |
| sTie-1                    | Tyrosine-protein kinase receptor Tie-1, soluble                 | 0.01 |



|                               |                                                                                                      |      |
|-------------------------------|------------------------------------------------------------------------------------------------------|------|
| GFRa-1                        | GDNF family receptor alpha-1                                                                         | 0.01 |
| MDC                           | C-C motif chemokine 22                                                                               | 0.01 |
| IL-19                         | Interleukin-19                                                                                       | 0.01 |
| tau                           | Microtubule-associated protein tau                                                                   | 0.01 |
| EDA                           | Ectodysplasin-A, secreted form                                                                       | 0.01 |
| pTEN                          | Phosphatidylinositol 3,4,5-trisphosphate 3-phosphatase and dual-specificity protein phosphatase PTEN | 0.01 |
| Vitronectin                   | Vitronectin                                                                                          | 0.01 |
| kallikrein 5                  | Kallikrein-5                                                                                         | 0.01 |
| TYK2                          | Non-receptor tyrosine-protein kinase TYK2                                                            | 0.01 |
| D-dimer                       | D-dimer                                                                                              | 0.01 |
| LYVE1                         | Lymphatic vessel endothelial hyaluronic acid receptor 1                                              | 0.01 |
| Granulysin                    | Granulysin                                                                                           | 0.01 |
| WNT7A                         | Protein Wnt-7a                                                                                       | 0.01 |
| gpIIbIIIa                     | Integrin alpha-IIb: beta-3 complex                                                                   | 0.01 |
| sICAM-1                       | Intercellular adhesion molecule 1                                                                    | 0.01 |
| NET1                          | Netrin-1                                                                                             | 0.01 |
| PARK7                         | Protein deglycase DJ-1                                                                               | 0.01 |
| IL-18 BP $\alpha$             | Interleukin-18-binding protein                                                                       | 0.01 |
| MED-1                         | Mediator of RNA polymerase II transcription subunit 1                                                | 0.01 |
| PD-L2                         | Programmed cell death 1 ligand 2                                                                     | 0.01 |
| IL-12 RB2                     | Interleukin-12 receptor subunit beta-2                                                               | 0.01 |
| Desmoglein-1                  | Desmoglein-1                                                                                         | 0.01 |
| ATP synthase beta chain       | ATP synthase subunit beta, mitochondrial                                                             | 0.01 |
| Lymphotoxin $\alpha$ 1/b2     | Lymphotoxin $\alpha$ 1: $\beta$ 2                                                                    | 0.01 |
| CRDL1                         | Chordin-like protein 1                                                                               | 0.01 |
| MMP-8                         | Neutrophil collagenase                                                                               | 0.01 |
| DR6                           | Tumor necrosis factor receptor superfamily member 21                                                 | 0.01 |
| GPC6                          | Glypican-6                                                                                           | 0.01 |
| TARC                          | C-C motif chemokine 17                                                                               | 0.01 |
| EPI                           | Epiregulin                                                                                           | 0.01 |
| PAK6                          | Serine/threonine-protein kinase PAK 6                                                                | 0.01 |
| NXP1                          | Neurexophilin-1                                                                                      | 0.01 |
| NCK1                          | Cytoplasmic protein NCK1                                                                             | 0.01 |
| OMD                           | Osteomodulin                                                                                         | 0.01 |
| Osteocalcin                   | Osteocalcin                                                                                          | 0.01 |
| HSP 27                        | Heat shock protein beta-1                                                                            | 0.01 |
| HCG                           | Human Chorionic Gonadotropin                                                                         | 0.01 |
| AMGO2                         | Amphoterin-induced protein 2                                                                         | 0.01 |
| PBEF                          | Nicotinamide phosphoribosyltransferase                                                               | 0.01 |
| FAM3D                         | Protein FAM3D                                                                                        | 0.01 |
| complement factor H-related 5 | Complement factor H-related protein 5                                                                | 0.01 |
| VEGF                          | Vascular endothelial growth factor A                                                                 | 0.01 |
| TFF1                          | Trefoil factor 1                                                                                     | 0.01 |
| Chk2                          | Serine/threonine-protein kinase Chk2                                                                 | 0.01 |
| Nr-CAM                        | Neuronal cell adhesion molecule                                                                      | 0.01 |
| ROR1                          | Tyrosine-protein kinase transmembrane receptor ROR1                                                  | 0.01 |
| LBP                           | Lipopolysaccharide-binding protein                                                                   | 0.01 |
| NPS-PLA2                      | Phospholipase A2, membrane associated                                                                | 0.01 |
| IgD                           | Immunoglobulin D                                                                                     | 0.01 |
| VCAM-1                        | Vascular cell adhesion protein 1                                                                     | 0.01 |
| $\alpha$ 1-Antichymotrypsin   | Alpha-1-antichymotrypsin                                                                             | 0.01 |
| TSP4                          | Thrombospondin-4                                                                                     | 0.01 |
| Cadherin-5                    | Cadherin-5                                                                                           | 0.01 |

|                         |                                                                              |      |
|-------------------------|------------------------------------------------------------------------------|------|
| DAN                     | Neuroblastoma suppressor of tumorigenicity 1                                 | 0.01 |
| C3a                     | C3a anaphylatoxin                                                            | 0.01 |
| LPPL                    | Galectin-10                                                                  | 0.01 |
| Protein S               | Vitamin K-dependent protein S                                                | 0.01 |
| DLRB1                   | Dynein light chain roadblock-type 1                                          | 0.01 |
| kallikrein 12           | Kallikrein-12                                                                | 0.01 |
| TGM3                    | Protein-glutamine gamma-glutamyltransferase E                                | 0.01 |
| MCP-2                   | C-C motif chemokine 8                                                        | 0.01 |
| BMP10                   | Bone morphogenetic protein 10                                                | 0.01 |
| CK-MM                   | Creatine kinase M-type                                                       | 0.01 |
| CD5L                    | CD5 antigen-like                                                             | 0.01 |
| CNTFR alpha             | Ciliary neurotrophic factor receptor subunit alpha                           | 0.01 |
| MCP-3                   | C-C motif chemokine 7                                                        | 0.01 |
| IL-13 Ra1               | Interleukin-13 receptor subunit alpha-1                                      | 0.01 |
| Ck-b-8-1                | Ck-beta-8-1                                                                  | 0.01 |
| ALCAM                   | CD166 antigen                                                                | 0.01 |
| TECK                    | C-C motif chemokine 25                                                       | 0.01 |
| PLCG1                   | 1-phosphatidylinositol 4,5-bisphosphate phosphodiesterase gamma-1            | 0.01 |
| Cathepsin A             | Lysosomal protective protein                                                 | 0.01 |
| IL-6 sRa                | Interleukin-6 receptor subunit alpha                                         | 0.01 |
| PFD5                    | Prefoldin subunit 5                                                          | 0.01 |
| Aminoacylase-1          | Aminoacylase-1                                                               | 0.01 |
| Secretin                | Secretin                                                                     | 0.01 |
| a2-Macroglobulin        | Alpha-2-macroglobulin                                                        | 0.01 |
| KYNU                    | Kynureninase                                                                 | 0.01 |
| Lysozyme                | Lysozyme C                                                                   | 0.01 |
| AURKB                   | Aurora kinase B                                                              | 0.01 |
| MRC2                    | C-type mannose receptor 2                                                    | 0.01 |
| LRP8                    | Low-density lipoprotein receptor-related protein 8                           | 0.01 |
| CD244                   | Natural killer cell receptor 2B4                                             | 0.01 |
| Layilin                 | Layilin                                                                      | 0.01 |
| ERAB                    | 3-hydroxyacyl-CoA dehydrogenase type-2                                       | 0.01 |
| Siglec-7                | Sialic acid-binding Ig-like lectin 7                                         | 0.01 |
| H6ST1                   | Heparan-sulfate 6-O-sulfotransferase 1                                       | 0.01 |
| MYPC1                   | Myosin-binding protein C, slow-type                                          | 0.01 |
| Luteinizing hormone     | Luteinizing hormone                                                          | 0.01 |
| IL-1F6                  | Interleukin-36 alpha                                                         | 0.01 |
| Spondin-1               | Spondin-1                                                                    | 0.01 |
| MPIF-1                  | C-C motif chemokine 23                                                       | 0.00 |
| Haptoglobin, Mixed Type | Haptoglobin                                                                  | 0.00 |
| Contactin-5             | Contactin-5                                                                  | 0.00 |
| SORC2                   | VPS10 domain-containing receptor SorCS2                                      | 0.00 |
| CHL1                    | Neural cell adhesion molecule L1-like protein                                | 0.00 |
| C2                      | Complement C2                                                                | 0.00 |
| Rb                      | Retinoblastoma-associated protein                                            | 0.00 |
| Troponin I              | Troponin I, cardiac muscle                                                   | 0.00 |
| C1-Esterase Inhibitor   | Plasma protease C1 inhibitor                                                 | 0.00 |
| NLGNX                   | Neuroigin-4, X-linked                                                        | 0.00 |
| IL-10 Rb                | Interleukin-10 receptor subunit beta                                         | 0.00 |
| C1QBP                   | Complement component 1 Q subcomponent-binding protein, mitochondrial         | 0.00 |
| CLF-1/CLC Complex       | Cytokine receptor-like factor 1:Cardiotrophin-like cytokine factor 1 Complex | 0.00 |

|                              |                                                                                |      |
|------------------------------|--------------------------------------------------------------------------------|------|
| RS3A                         | 40S ribosomal protein S3a                                                      | 0.00 |
| LCK                          | Tyrosine-protein kinase Lck                                                    | 0.00 |
| PK3CG                        | Phosphatidylinositol 4,5-bisphosphate 3-kinase catalytic subunit gamma isoform | 0.00 |
| SRCN1                        | Proto-oncogene tyrosine-protein kinase Src                                     | 0.00 |
| Ephrin-A5                    | Ephrin-A5                                                                      | 0.00 |
| PERL                         | Lactoperoxidase                                                                | 0.00 |
| ACE2                         | Angiotensin-converting enzyme 2                                                | 0.00 |
| IL-23 R                      | Interleukin-23 receptor                                                        | 0.00 |
| b-NGF                        | beta-nerve growth factor                                                       | 0.00 |
| Lamin-B1                     | Lamin-B1                                                                       | 0.00 |
| Carbonic anhydrase 9         | Carbonic anhydrase 9                                                           | 0.00 |
| IL-15 Ra                     | Interleukin-15 receptor subunit alpha                                          | 0.00 |
| PRKACA                       | cAMP-dependent protein kinase catalytic subunit alpha                          | 0.00 |
| RET                          | Proto-oncogene tyrosine-protein kinase receptor Ret                            | 0.00 |
| Fibrinogen g-chain dimer     | Fibrinogen gamma chain                                                         | 0.00 |
| Siglec-3                     | Myeloid cell surface antigen CD33                                              | 0.00 |
| Lymphotoxin b R              | Tumor necrosis factor receptor superfamily member 3                            | 0.00 |
| TrATPase                     | Tartrate-resistant acid phosphatase type 5                                     | 0.00 |
| paraoxonase 1                | Serum paraoxonase/arylesterase 1                                               | 0.00 |
| IR                           | Insulin receptor                                                               | 0.00 |
| KI3L2                        | Killer cell immunoglobulin-like receptor 3DL2                                  | 0.00 |
| 4-1BB                        | Tumor necrosis factor receptor superfamily member 9                            | 0.00 |
| TNF sR-II                    | Tumor necrosis factor receptor superfamily member 1B                           | 0.00 |
| Karyopherin-a2               | Importin subunit alpha-1                                                       | 0.00 |
| Dkk-4                        | Dickkopf-related protein 4                                                     | 0.00 |
| PAFAH                        | Platelet-activating factor acetylhydrolase                                     | 0.00 |
| PDE5A                        | cGMP-specific 3',5'-cyclic phosphodiesterase                                   | 0.00 |
| CD48                         | CD48 antigen                                                                   | 0.00 |
| TCCR                         | Interleukin-27 receptor subunit alpha                                          | 0.00 |
| MIG                          | C-X-C motif chemokine 9                                                        | 0.00 |
| Noggin                       | Noggin                                                                         | 0.00 |
| ULBP-1                       | NKG2D ligand 1                                                                 | 0.00 |
| HHLA2                        | HERV-H LTR-associating protein 2                                               | 0.00 |
| sLeptin R                    | Leptin receptor                                                                | 0.00 |
| Leptin                       | Leptin                                                                         | 0.00 |
| Artemin                      | Artemin                                                                        | 0.00 |
| resistin                     | Resistin                                                                       | 0.00 |
| PLXB2                        | Plexin-B2                                                                      | 0.00 |
| Histone H2A.z                | Histone H2A.z                                                                  | 0.00 |
| PLXC1                        | Plexin-C1                                                                      | 0.00 |
| GITR                         | Tumor necrosis factor receptor superfamily member 18                           | 0.00 |
| ULBP-2                       | NKG2D ligand 2                                                                 | 0.00 |
| IL-7                         | Interleukin-7                                                                  | 0.00 |
| Cadherin-12                  | Cadherin-12                                                                    | 0.00 |
| DC-SIGNR                     | C-type lectin domain family 4 member M                                         | 0.00 |
| sFRP-3                       | Secreted frizzled-related protein 3                                            | 0.00 |
| FGF23                        | Fibroblast growth factor 23                                                    | 0.00 |
| Trypsin 2                    | Trypsin-2                                                                      | 0.00 |
| Glutathione S-transferase Pi | Glutathione S-transferase P                                                    | 0.00 |
| BFL1                         | Bcl-2-related protein A1                                                       | 0.00 |
| DLL1                         | Delta-like protein 1                                                           | 0.00 |
| Transferrin                  | Serotransferrin                                                                | 0.00 |
| B7-H1                        | Programmed cell death 1 ligand 1                                               | 0.00 |

|                           |                                                                   |      |
|---------------------------|-------------------------------------------------------------------|------|
| UNC5H4                    | Netrin receptor UNC5D                                             | 0.00 |
| Flt3 ligand               | Fms-related tyrosine kinase 3 ligand                              | 0.00 |
| TNFSF15                   | Tumor necrosis factor ligand superfamily member 15                | 0.00 |
| MMP-13                    | Collagenase 3                                                     | 0.00 |
| IL-1Rrp2                  | Interleukin-1 receptor-like 2                                     | 0.00 |
| FETUB                     | Fetuin-B                                                          | 0.00 |
| Enterokinase              | Enteropeptidase                                                   | 0.00 |
| CTLA-4                    | Cytotoxic T-lymphocyte protein 4                                  | 0.00 |
| IMB1                      | Importin subunit beta-1                                           | 0.00 |
| HPG-                      | 15-hydroxyprostaglandin dehydrogenase [NAD(+)]                    | 0.00 |
| SARP-2                    | Secreted frizzled-related protein 1                               | 0.00 |
| ILT-4                     | Leukocyte immunoglobulin-like receptor subfamily B member 2       | 0.00 |
| Coagulation Factor VII    | Coagulation factor VII                                            | 0.00 |
| MIS                       | Muellerian-inhibiting factor                                      | 0.00 |
| WIF-1                     | Wnt inhibitory factor 1                                           | 0.00 |
| C5                        | Complement C5                                                     | 0.00 |
| LRRT1                     | Leucine-rich repeat transmembrane neuronal protein 1              | 0.00 |
| Coagulation Factor Xa     | Coagulation factor Xa                                             | 0.00 |
| CAMK2A                    | Calcium/calmodulin-dependent protein kinase type II subunit alpha | 0.00 |
| bFGF-R                    | Fibroblast growth factor receptor 1                               | 0.00 |
| AMNLS                     | Protein amnionless                                                | 0.00 |
| SIRT2                     | NAD-dependent protein deacetylase sirtuin-2                       | 0.00 |
| GFRa-2                    | GDNF family receptor alpha-2                                      | 0.00 |
| BCL6                      | B-cell lymphoma 6 protein                                         | 0.00 |
| DSC2                      | Desmocollin-2                                                     | 0.00 |
| IL-27                     | Interleukin-27                                                    | 0.00 |
| BNP-32                    | Brain natriuretic peptide 32                                      | 0.00 |
| UFC1                      | Ubiquitin-fold modifier-conjugating enzyme 1                      | 0.00 |
| IL-22BP                   | Interleukin-22 receptor subunit alpha-2                           | 0.00 |
| PARC                      | C-C motif chemokine 18                                            | 0.00 |
| Contactin-4               | Contactin-4                                                       | 0.00 |
| CRP                       | C-reactive protein                                                | 0.00 |
| C3adesArg                 | C3a anaphylatoxin des Arginine                                    | 0.00 |
| Laminin                   | Laminin                                                           | 0.00 |
| CHIP                      | E3 ubiquitin-protein ligase CHIP                                  | 0.00 |
| SSRP1                     | FACT complex subunit SSRP1                                        | 0.00 |
| EPHB2                     | Ephrin type-B receptor 2                                          | 0.00 |
| TGF-b R II                | TGF-beta receptor type-2                                          | 0.00 |
| Galectin-7                | Galectin-7                                                        | 0.00 |
| DcR3                      | Tumor necrosis factor receptor superfamily member 6B              | 0.00 |
| NADPH-P450 Oxidoreductase | NADPH--cytochrome P450 reductase                                  | 0.00 |
| PH                        | Pancreatic hormone                                                | 0.00 |
| PTN                       | Pleiotrophin                                                      | 0.00 |
| C3                        | Complement C3                                                     | 0.00 |
| IL-9                      | Interleukin-9                                                     | 0.00 |
| IL-13                     | Interleukin-13                                                    | 0.00 |
| NOTC2                     | Neurogenic locus notch homolog protein 2                          | 0.00 |
| PDXK                      | Pyridoxal kinase                                                  | 0.00 |
| GPC5                      | Glypican-5                                                        | 0.00 |
| TNF-b                     | Lymphotoxin-alpha                                                 | 0.00 |
| IL-17D                    | Interleukin-17D                                                   | 0.00 |
| SEPR                      | Prolyl endopeptidase FAP                                          | 0.00 |
| Heparin cofactor II       | Heparin cofactor 2                                                | 0.00 |

|                             |                                                                                                    |      |
|-----------------------------|----------------------------------------------------------------------------------------------------|------|
| Calpastatin                 | Calpastatin                                                                                        | 0.00 |
| TGF-b R III                 | Transforming growth factor beta receptor type 3                                                    | 0.00 |
| Factor B                    | Complement factor B                                                                                | 0.00 |
| I-309                       | C-C motif chemokine 1                                                                              | 0.00 |
| LD78-beta                   | C-C motif chemokine 3-like 1                                                                       | 0.00 |
| INGR2                       | Interferon gamma receptor 2                                                                        | 0.00 |
| LRRT3                       | Leucine-rich repeat transmembrane neuronal protein 3                                               | 0.00 |
| Lumican                     | Lumican                                                                                            | 0.00 |
| Factor I                    | Complement factor I                                                                                | 0.00 |
| TAK1-TAB1                   | Mitogen-activated protein kinase 7:TGF-beta-activated kinase 1 and MAP3K7-binding protein 1 fusion | 0.00 |
| ApoM                        | Apolipoprotein M                                                                                   | 0.00 |
| PEDF                        | Pigment epithelium-derived factor                                                                  | 0.00 |
| TSP2                        | Thrombospondin-2                                                                                   | 0.00 |
| Esterase D                  | S-formylglutathione hydrolase                                                                      | 0.00 |
| SREC-I                      | Scavenger receptor class F member 1                                                                | 0.00 |
| CK-MB                       | Creatine kinase M-type:Creatine kinase B-type heterodimer                                          | 0.00 |
| Tropomyosin 4               | Tropomyosin alpha-4 chain                                                                          | 0.00 |
| PDGF-CC                     | Platelet-derived growth factor C                                                                   | 0.00 |
| CD177                       | CD177 antigen                                                                                      | 0.00 |
| ROBO2                       | Roundabout homolog 2                                                                               | 0.00 |
| IL-34                       | Interleukin-34                                                                                     | 0.00 |
| FABP                        | Fatty acid-binding protein, heart                                                                  | 0.00 |
| FBLN3                       | EGF-containing fibulin-like extracellular matrix protein 1                                         | 0.00 |
| Macrophage mannose receptor | Macrophage mannose receptor 1                                                                      | 0.00 |
| BSP                         | Bone sialoprotein 2                                                                                | 0.00 |
| DAF                         | Complement decay-accelerating factor                                                               | 0.00 |
| PDE4D                       | cAMP-specific 3',5'-cyclic phosphodiesterase 4D                                                    | 0.00 |
| PPID                        | Peptidyl-prolyl cis-trans isomerase D                                                              | 0.00 |
| MDM2                        | E3 ubiquitin-protein ligase Mdm2                                                                   | 0.00 |
| LSAMP                       | Limbic system-associated membrane protein                                                          | 0.00 |
| C3b                         | Complement C3b                                                                                     | 0.00 |
| PTH                         | Parathyroid hormone                                                                                | 0.00 |
| NSF1C                       | NSFL1 cofactor p47                                                                                 | 0.00 |
| GSTA3                       | Glutathione S-transferase A3                                                                       | 0.00 |
| PDE7A                       | High affinity cAMP-specific 3',5'-cyclic phosphodiesterase 7A                                      | 0.00 |
| C1QR1                       | Complement component C1q receptor                                                                  | 0.00 |
| FYN                         | Tyrosine-protein kinase Fyn                                                                        | 0.00 |
| YES                         | Tyrosine-protein kinase Yes                                                                        | 0.00 |
| IL-6                        | Interleukin-6                                                                                      | 0.00 |
| CSH                         | Chorionic somatomammotropin hormone                                                                | 0.00 |
| CHST2                       | Carbohydrate sulfotransferase 2                                                                    | 0.00 |
| PPase                       | Inorganic pyrophosphatase                                                                          | 0.00 |
| FAK1                        | Focal adhesion kinase 1                                                                            | 0.00 |
| ERBB1                       | Epidermal growth factor receptor                                                                   | 0.00 |
| LTBP4                       | Latent-transforming growth factor beta-binding protein 4                                           | 0.00 |
| Cytochrome c                | Cytochrome c                                                                                       | 0.00 |
| Troponin T                  | Troponin T, cardiac muscle                                                                         | 0.00 |
| COMM7                       | COMM domain-containing protein 7                                                                   | 0.00 |
| sCD163                      | Scavenger receptor cysteine-rich type 1 protein M130                                               | 0.00 |
| HSP 60                      | 60 kDa heat shock protein, mitochondrial                                                           | 0.00 |
| TWEAK                       | Tumor necrosis factor ligand superfamily member 12                                                 | 0.00 |
| TGF-b3                      | Transforming growth factor beta-3                                                                  | 0.00 |
| Met                         | Hepatocyte growth factor receptor                                                                  | 0.00 |

|                           |                                                                         |      |
|---------------------------|-------------------------------------------------------------------------|------|
| TRAIL R2                  | Tumor necrosis factor receptor superfamily member 10B                   | 0.00 |
| IgA                       | Immunoglobulin A                                                        | 0.00 |
| MMP-3                     | Stromelysin-1                                                           | 0.00 |
| MBD4                      | Methyl-CpG-binding domain protein 4                                     | 0.00 |
| IGFBP-2                   | Insulin-like growth factor-binding protein 2                            | 0.00 |
| BDNF                      | Brain-derived neurotrophic factor                                       | 0.00 |
| LIGHT                     | Tumor necrosis factor ligand superfamily member 14                      | 0.00 |
| CD30                      | Tumor necrosis factor receptor superfamily member 8                     | 0.00 |
| EphB6                     | Ephrin type-B receptor 6                                                | 0.00 |
| FER                       | Tyrosine-protein kinase Fer                                             | 0.00 |
| SAA                       | Serum amyloid A-1 protein                                               | 0.00 |
| Midkine                   | Midkine                                                                 | 0.00 |
| Gastrin-releasing peptide | Gastrin-releasing peptide                                               | 0.00 |
| IGF-II receptor           | Cation-independent mannose-6-phosphate receptor                         | 0.00 |
| cGMP-stimulated PDE       | cGMP-dependent 3',5'-cyclic phosphodiesterase                           | 0.00 |
| RNF43                     | E3 ubiquitin-protein ligase RNF43                                       | 0.00 |
| LYNB                      | Tyrosine-protein kinase Lyn, isoform B                                  | 0.00 |
| PDGFRA                    | Platelet-derived growth factor receptor alpha                           | 0.00 |
| CCL28                     | C-C motif chemokine 28                                                  | 0.00 |
| BTK                       | Tyrosine-protein kinase BTK                                             | 0.00 |
| Sphingosine kinase 1      | Sphingosine kinase 1                                                    | 0.00 |
| Coagulation Factor XI     | Coagulation Factor XI                                                   | 0.00 |
| ESAM                      | Endothelial cell-selective adhesion molecule                            | 0.00 |
| TFPI                      | Tissue factor pathway inhibitor                                         | 0.00 |
| NKp30                     | Natural cytotoxicity triggering receptor 3                              | 0.00 |
| N-terminal pro-BNP        | N-terminal pro-BNP                                                      | 0.00 |
| TNF sR-I                  | Tumor necrosis factor receptor superfamily member 1A                    | 0.00 |
| ZAP70                     | Tyrosine-protein kinase ZAP-70                                          | 0.00 |
| ERBB2                     | Receptor tyrosine-protein kinase erbB-2                                 | 0.00 |
| ATPO                      | ATP synthase subunit O, mitochondrial                                   | 0.00 |
| PDGF Rb                   | Platelet-derived growth factor receptor beta                            | 0.00 |
| IL-23                     | Interleukin-23                                                          | 0.00 |
| dopa decarboxylase        | Aromatic-L-amino-acid decarboxylase                                     | 0.00 |
| PKC-A                     | Protein kinase C alpha type                                             | 0.00 |
| TPSG1                     | Tryptase gamma                                                          | 0.00 |
| PIGF                      | Placenta growth factor                                                  | 0.00 |
| CDK5/p35                  | Cyclin-dependent kinase 5:Cyclin-dependent kinase 5 activator 1 complex | 0.00 |
| JAG1                      | Protein jagged-1                                                        | 0.00 |
| TSH                       | Thyroid Stimulating Hormone                                             | 0.00 |
| gp130, soluble            | Interleukin-6 receptor subunit beta                                     | 0.00 |
| CD38                      | ADP-ribosyl cyclase/cyclic ADP-ribose hydrolase 1                       | 0.00 |
| ARTS1                     | Endoplasmic reticulum aminopeptidase 1                                  | 0.00 |
| FSTL3                     | Follistatin-related protein 3                                           | 0.00 |
| RSPO3                     | R-spondin-3                                                             | 0.00 |
| HIPK3                     | Homeodomain-interacting protein kinase 3                                | 0.00 |
| Carbonic Anhydrase IV     | Carbonic anhydrase 4                                                    | 0.00 |
| IL-17                     | Interleukin-17A                                                         | 0.00 |
| CATC                      | Dipeptidyl peptidase 1                                                  | 0.00 |
| CATF                      | Cathepsin F                                                             | 0.00 |
| IFN-aA                    | Interferon alpha-2                                                      | 0.00 |

**Supplemental Table 3.** Correlations ( $r^2$ ) between G-3-P, iFGF23, phosphate, klotho, eGFR

|                 | <b>V<br/>G-3-P</b> | <b>A<br/>G-3-P</b> | <b>V<br/>iFGF23</b> | <b>A<br/>iFGF23</b> | <b>V<br/>PO4</b> | <b>A<br/>PO4</b> | <b>V<br/>Klotho</b> | <b>eGFR</b> |
|-----------------|--------------------|--------------------|---------------------|---------------------|------------------|------------------|---------------------|-------------|
| <b>V G-3-P</b>  | 1.00               | 0.87               | 0.63                | 0.76                | 0.58             | 0.40             | 0.01                | 0.10        |
| <b>A G-3-P</b>  |                    | 1.00               | 0.52                | 0.65                | 0.66             | 0.41             | 0.00                | 0.06        |
| <b>V iFGF23</b> |                    |                    | 1.00                | 0.80                | 0.22             | 0.15             | 0.06                | 0.43        |
| <b>A iFGF23</b> |                    |                    |                     | 1.00                | 0.28             | 0.16             | 0.02                | 0.31        |
| <b>V PO4</b>    |                    |                    |                     |                     | 1.00             | 0.70             | 0.06                | 0.00        |
| <b>A PO4</b>    |                    |                    |                     |                     |                  | 1.00             | 0.01                | 0.03        |
| <b>V Klotho</b> |                    |                    |                     |                     |                  |                  | 1.00                | 0.07        |
| <b>eGFR</b>     |                    |                    |                     |                     |                  |                  |                     | 1.00        |

V, venous; A, arterial; PO4, phosphate; eGFR, estimated glomerular filtration rate

Correlations were performed on  $\log_2$  transformed values for G-3-P, iFGF23, PO4, and eGFR

**Supplemental Table 4.** Oligonucleotide sequences

| <b>sgRNA target sequences</b>                    |                               |                                      |
|--------------------------------------------------|-------------------------------|--------------------------------------|
| <i>Lpar1</i> #1                                  | TCTTTGGCTATGTTTCGCCAG         |                                      |
| <i>Lpar1</i> #2                                  | GGAGACTGACTGTTAGCACG          |                                      |
| <i>Lpar4</i> #1                                  | CTGATGGTACGCGATCGGAA          |                                      |
| <i>Lpar4</i> #2                                  | CAATGTTGCAGGCTTGCGGA          |                                      |
| <i>Vdr</i> #1                                    | TGGAGATTGCCGCATCACCA          |                                      |
| <i>Vdr</i> #2                                    | AGCGTTGAAGTGGAAGCCCG          |                                      |
| <b>shRNA target sequences</b>                    |                               |                                      |
| <i>Gpat1</i>                                     | GCGAGAGGCGTTATCAGAATGCTGCGGAA |                                      |
| <i>Gpat2</i> #1                                  | CAGCAGAGGAGTAACCACAATGGTCAAGA |                                      |
| <i>Gpat2</i> #2                                  | CCATTGCCTATGACCTGGTTCCAGATGCA |                                      |
| <i>Gpat3</i>                                     | GATCAGCTTGCTGATTATAGGAACTACAC |                                      |
| <i>Gpat4</i>                                     | GATGAAGTGACAAAGAGATTCTCGGCAGA |                                      |
| <b>RT-qPCR</b>                                   | <b>Forward Primer</b>         | <b>Reverse Primer</b>                |
| <i>Vdr</i>                                       | GAATGTGCCTCGGATCTGTGG         | ATGCGGCAATCTCCATTGAAG                |
| <i>Fgf23</i>                                     | ATGCTAGGGACCTGCCTTAGA         | GGAGCCAAGCAATGGGGAA                  |
| <i>Cyp24a1</i>                                   | GCTGATGACCGACGGTGAG           | GTGCGGTACAGAGCTTCCAG                 |
| <i>B-actin</i>                                   | GGCTGTATTCCCCTCCATCG          | CCAGTTGGTAACAATGCCATGT               |
| <i>Gapdh</i>                                     | TAACATCAAATGGGGTGAGG          | GGTTCACACCCATCACAAAC                 |
| <i>Lpar1</i>                                     | AGCCATGAACGAACAACAGTG         | CATGATGAACACGCAAACAGTG               |
| <i>Lpar2</i>                                     | TGCTACTACAACGAGACCATCG        | ATGGCTGCAATAACCAGCAGA                |
| <i>Lpar3</i>                                     | CAAGCGCATGGACTTTTTCTAC        | GAAATCCGCAGCAGCTAAGTT                |
| <i>Lpar4</i>                                     | AGTGCCTCCCTGTTTGTCTTC         | GCCAGTGGCGATTAAAGTTGTAA              |
| <i>Gpat1</i>                                     | CTTGGCCGATGTAAACACACC         | CTTCCGGCTCATAAGGCTCTC                |
| <i>Gpat2</i>                                     | AGCAGAGGAGTAACCACAATGG        | GGGCGATACTTCCCAGGA                   |
| <i>Gpat3</i>                                     | CGGATTATCCCTGGGTATCTCG        | CGAAGTCCCTTCCCTCGAAGAC               |
| <i>Gpat4</i>                                     | AACCTCCTGGGTATCTCCCTG         | CCGTTGGTGTAGGGCTTGT                  |
| <i>Fgf23<sup>flf</sup></i> /<br><i>Dmpl-cre+</i> | ATTGCCAGTTTAGTTCCCTG          | GACGCTTCTGAAGTAC<br>GACGCTTCTGAAGTAC |
| <b>ChIP qPCR</b>                                 | <b>Forward Primer</b>         | <b>Reverse Primer</b>                |
| <i>Fgf23</i> PR1                                 | TGGAAGTGGGGACAGGTCAA          | AAGCCAGTGCTCCCATAAGT                 |
| <i>Fgf23</i> PR2                                 | CCTCATCCAGACGAGGGAAAC         | TGTTAGGTGGGAGCATGAGC                 |
| <i>Fgf23</i> PR3                                 | GCTTCCTGCCCTCTGATTCC          | TGTTAGGTGGGAGCATGAGC                 |
| <i>Fgf23</i> PR4                                 | TGCCTTCCAATGGACTGTGTG         | CTGCAGAAATTGCTCTGTGCAT               |
| <i>Fgf23</i> PR5                                 | TCGCAGCAATCAGGAGACTG          | ACCAAGACAGGGCCTCACTA                 |
| <i>Fgf23</i> PR6                                 | GACCCTTCCCATTGGTTTCCA         | AGCCTGGTTATTTTTCTCTTGTGC             |
| <i>Fgf23</i> PR7                                 | AAACCCATCGGTGACTGCAT          | ACCCTCTACTGAGGAGCTGT                 |
| <i>Fgf23</i> PR1 = promotor region -395 to -311  |                               |                                      |
| <i>Fgf23</i> PR2 = promotor region -797 to -661  |                               |                                      |
| <i>Fgf23</i> PR3 = promotor region -902 to -661  |                               |                                      |



*Fgf23* PR4 = promotor region -1103 to -978  
*Fgf23* PR5 = promotor region -1569 to -1486  
*Fgf23* PR6 = promotor region -2.133 to 2.033  
*Fgf23* PR7 = promotor region -3390 to -3291
